# Supplementary material for: Nuclear hormone receptor NHR-49 acts in parallel with HIF-1 to promote hypoxia adaptation in Caenorhabditis elegans
Source: eLife. 2022 Mar 14;11:e67911. doi: 10.7554/eLife.67911 (PMC8959602; doi:10.7554/eLife.67911)
Supplement: Source data 1. [file elife-67911-data1.xlsx]

## Sheet: Stats
Figure	Comparison	p value	95% CI of diff
1A	WT 21% vs. WT 0.5%	0.0019	-73.51 to -13.64
1A	WT 0.5% vs. nhr-49(nr2041) 0.5%	0.0055	9.361 to 69.23
1A	WT 0.5% vs. hif-1(ia4) 0.5%	0.0064	8.760 to 68.62
1C	fmo-2p::gfp 21% vs. fmo-2p::gfp 0.5%	<0.0001	-658.9 to -462.9
1C	fmo-2p::gfp;nhr-49(nr2041) 21% vs. fmo-2p::gfp;nhr-49(nr2041) 0.5%	0.0069	-215.7 to -25.21
1C	fmo-2p::gfp 0.5% vs. fmo-2p::gfp;nhr-49(nr2041) 0.5%	<0.0001	349.0 to 547.8
2A	WT 0.5% vs. nhr-49(nr2041) 0.5%	<0.0001	42.14 to 81.82
2A	WT 0.5% vs. hif-1(ia4) 0.5%	<0.0001	40.96 to 80.64
2A	WT 0.5% vs. hif-1(ia4);nhr-49(nr2041) 0.5%	<0.0001	64.86 to 104.5
2A	nhr-49(nr2041) 0.5% vs. hif-1(ia4);nhr-49(nr2041) 0.5%	0.017	2.885 to 42.56
2A	hif-1(ia4) 0.5% vs. hif-1(ia4);nhr-49(nr2041) 0.5%	0.0107	4.065 to 43.74
2B	WT 0.5% vs. nhr-49(nr2041) 0.5%	0.0001	22.57 to 117.9
2B	WT 0.5% vs. hif-1(ia4) 0.5%	0.0004	27.43 to 122.8
2B	WT 0.5% vs. hif-1(ia4);nhr-49(nr2041) 0.5%	<0.0001	51.11 to 139.4
2B	nhr-49(nr2041) 0.5% vs. hif-1(ia4);nhr-49(nr2041) 0.5%	0.8853	-22.68 to 72.68
2B	hif-1(ia4) 0.5% vs. hif-1(ia4);nhr-49(nr2041) 0.5%	0.9876	-27.55 to 67.82
2C	WT vs. hif-1(ia4)	<0.0001	76.61 to 106.7
2C	WT vs. nhr-49(nr2041)	0.2806	-23.39 to 6.721
2E	NHR-49::GFP non-GFP sibs vs. NHR-49::GFP	0.7816	-29.08 to 15.03
2E	hif-1(ia4);NHR-49::GFP non-GFP sibs vs. hif-1(ia4);NHR-49::GFP	0.0337	-45.81 to -1.692
2E	NHR-49::GFP vs. hif-1(ia4);NHR-49::GFP	0.3391	-9.008 to 35.11
3E	WT vs. nhr-49(nr2041)	<0.0001	24.27 to 61.66
3E	WT vs. fmo-2(ok2147)	0.0715	-0.8964 to 38.32
3E	WT vs. acs-2(ok2457)	0.3615	-5.756 to 33.46
3E	WT vs. fmo-2(ok2147);acs-2(2457)	<0.0001	13.69 to 51.08
3E	fmo-2(ok2147) vs. fmo-2(ok2147);acs-2(2457)	0.3793	-5.940 to 33.28
3E	acs-2(ok2457) vs. fmo-2(ok2147);acs-2(2457)	0.0768	-1.080 to 38.14
4B	EV(RNAi) 21% vs. EV(RNAi) 0.5%	<0.0001	-1147 to -411.6
4B	nhr-49(RNAi) 21% vs. nhr-49(RNAi) 0.5%	>0.9999	-385.4 to 368.7
4B	hif-1(RNAi) 21% vs. hif-1(RNAi) 0.5%	0.0496	-765.3 to -0.3002
4B	hkp-1(RNAi) 21% vs. hpk-1(RNAi) 0.5%	>0.9999	-325.0 to 445.8
4B	nhr-67(RNAi) 21% vs. nhr-67(RNAi) 0.5%	<0.0001	-1038 to -288.8
4B	EV(RNAi) 0.5% vs. nhr-49(RNAi) 0.5%	<0.0001	312.0 to 1083
4B	EV(RNAi) 0.5% vs. hif-1(RNAi) 0.5%	0.9622	-233.4 to 537.5
4B	EV(RNAi) 0.5% vs. hpk-1(RNAi) 0.5%	<0.0001	387.5 to 1158
4B	EV(RNAi) 0.5% vs. nhr-67(RNAi) 0.5%	0.8681	-573.6 to 197.2
4D	LGG-1::GFP 21% vs. LGG-1::GFP 0.5%	<0.0001	-5.012 to -3.763
4D	LGG-1::GFP;nhr-49(nr2041) 21% vs. LGG-1::GFP;nhr-49(nr2041) 0.5%	0.3906	-0.9602 to 0.1883
4D	LGG-1::GFP;hif-1(ia4) 21% vs. LGG-1::GFP;hif-1(ia4) 0.5%	<0.0001	-4.929 to -3.807
4D	LGG-1::GFP 0.5% vs. LGG-1::GFP;nhr-49(nr2041) 0.5%	<0.0001	3.847 to 5.058
4D	LGG-1::GFP 0.5% vs. LGG-1::GFP;hif-1(ia4) 0.5%	0.2509	-0.1460 to 1.077
4D	LGG-1::GFP;nhr-49(nr2041) 0.5% vs. LGG-1::GFP;hif-1(ia4) 0.5%	<0.0001	-4.579 to -3.395
4E	WT vs. nhr-49(nr2041)	0.0008	16.68 to 69.98
4E	WT vs. lgg-2(tm5755)	0.0062	8.350 to 61.65
4E	WT vs. nhr-49(nr2041);lgg-2(tm5755)	0.0027	11.68 to 64.98
4E	nhr-49(nr2041) vs. nhr-49(nr2041);lgg-2(tm5755)	0.9973	-31.65 to 21.65
4E	lgg-2(tm5755) vs. nhr-49(nr2041);lgg-2(tm5755)	0.9998	-23.32 to 29.98
4F	WT vs. nhr-49(nr2041)	0.0002	19.38 to 65.29
4F	WT vs. epg-6(tm8366)	<0.0001	24.04 to 69.96
4F	WT vs. nhr-49(nr2041);epg-6(tm8366)	<0.0001	23.71 to 69.62
4F	nhr-49(nr2041) vs. nhr-49(nr2041);epg-6(tm8366)	0.9972	-18.62 to 27.29
4F	epg-6(tm8366) vs. nhr-49(nr2041);epg-6(tm8366)	>0.9999	-23.29 to 22.62
4G	EV(RNAi) 21% vs. EV(RNAi) 0.5%	<0.0001	-3.970 to -2.755
4G	hpk-1(RNAi) 21% vs.hpk-1(RNAi) 0.5%	0.5866	-0.9377 to 0.2596
4G	nhr-67(RNAi) 21% vs. nhr-67RNAi) 0.5%	<0.0001	-4.244 to -3.104
4G	EV(RNAi) 0.5% vs.hpk-1(RNAi) 0.5%	<0.0001	2.302 to 3.487
4G	EV(RNAi) 0.5% vs. nhr-67RNAi) 0.5%	0.9508	-0.7902 to 0.4174
5A	WT vs. nhr-49(nr2041)	0.0122	7.679 to 59.52
5A	WT vs. nhr-49(et13)	0.0426	-52.72 to -0.8791
5A	nhr-49(nr2041) vs. nhr-49(et13)	0.0001	-86.32 to -34.48
5B	intestinal nhr-49 rescue non-GFP sibs vs. intestinal nhr-49 rescue	0.0324	-75.91 to -4.323
5B	hypodermal nhr-49 rescue non-GFP sibs vs hypodermal nhr-49 rescue	0.0331	-63.35 to -3.331
5B	neuronal nhr-49 rescue non-GFP sibs vs. neuronal nhr-49 rescue	0.0321	-49.76 to -2.741
5B	endogenous nhr-49 rescue non-GFP sibs vs. endogenous nhr-49 rescue	0.0206	-64.43 to -7.087
5B	BWM nhr-49 rescue non-GFP sibs vs. BWM nhr-49 rescue	0.0111	-80.45 to -15.55
5C	acs-2	0.0166	-19.22 to -1.241
5C	oac-14	>0.9999	-8.479 to 9.499
5C	fmo-2	0.0002	-23.55 to -5.576
5C	cyp-13a11	>0.9999	-8.082 to 9.897
5C	cyp-25a3	0.9006	-12.88 to 5.094
5C	ugt-20	>0.9999	-10.03 to 10.07
5C	atg-2	>0.9999	-8.907 to 9.072
5C	epg-9	>0.9999	-9.136 to 8.843
5C	lgg-2	>0.9999	-8.910 to 9.069
5C	atg-13	>0.9999	-9.137 to 8.842
6A	WT 21% vs. WT 0.5%	0.892	-2.914 to 1.527
6A	nhr-49(nr2041) 21% vs. nhr-49(nr2041) 0.5%	0.0021	-5.710 to -1.270
6A	hif-1(ia4) 21% vs. hif-1(ia4) 0.5%	0.6822	-3.198 to 1.242
6A	WT 0.5% vs. nhr-49(nr2041) 0.5%	0.0091	-5.109 to -0.6683
6A	WT 0.5% vs. hif-1(ia4) 0.5%	0.9983	-2.486 to 1.955
6C	EV(RNAi) 21% vs. EV(RNAi) 0.5%	0.0347	-400.0 to -7.991
6C	nhr-67(RNAi) 21% vs. nhr-67(RNAi) 0.5%	<0.0001	-702.6 to -241.4
6C	nhr-49(nr2041);EV(RNAi) 21% vs. nhr-49(nr2041);EV(RNAi) 0.5%	0.9998	-243.7 to 179.9
6C	nhr-49(nr2041);nhr-67(RNAi) 21% vs. nhr-49(nr2041);nhr-67(RNAi) 0.5%	>0.9999	-232.3 to 202.5
6C	EV(RNAi) 21% vs. nhr-67(RNAi) 21%	0.0005	-515.2 to -91.33
6C	nhr-49(nr2041);EV(RNAi) 21% vs. nhr-49(nr2041);nhr-67(RNAi) 21%	>0.9999	-230.3 to 183.9
6C	EV(RNAi) 0.5% vs. nhr-67(RNAi) 0.5%	<0.0001	-787.3 to -355.1
6C	nhr-49(nr2041);EV(RNAi) 0.5% vs. nhr-49(nr2041);nhr-67(RNAi) 0.5%	>0.9999	-228.0 to 215.7
6E	EV(RNAi) 21% vs. EV(RNAi) 0.5%	<0.0001	-1160 to -442.7
6E	nhr-67(RNAi) 21% vs. nhr-67(RNAi) 0.5%	<0.0001	-1030 to -302.1
6E	nhr-49(nr2041);EV(RNAi) 21% vs. nhr-49(nr2041);EV(RNAi) 0.5%	0.9995	-441.0 to 312.3
6E	nhr-49(nr2041);nhr-67(RNAi) 21% vs. nhr-49(nr2041);nhr-67(RNAi) 0.5%	>0.9999	-405.0 to 354.4
6E	EV(RNAi) 21% vs. nhr-67(RNAi) 21%	0.0002	-866.0 to -170.0
6E	nhr-49(nr2041);EV(RNAi) 21% vs. nhr-49(nr2041);nhr-67(RNAi) 21%	>0.9999	-384.9 to 352.1
6E	EV(RNAi) 0.5% vs. nhr-67(RNAi) 0.5%	0.0406	-756.4 to -8.830
6E	nhr-49(nr2041);EV(RNAi) 0.5% vs. nhr-49(nr2041);nhr-67(RNAi) 0.5%	>0.9999	-405.0 to 354.4
6G	EV(RNAi) 21% vs. EV(RNAi) 0.5%	<0.0001	-661.2 to -179.8
6G	nhr-49(RNAi) 21% vs. nhr-49(RNAi) 0.5%	0.9951	-282.8 to 195.5
6G	nhr-67(RNAi) 21% vs. nhr-67(RNAi) 0.5%	0.0081	-508.3 to -47.78
6G	EV(RNAi) 21% vs. nhr-49(RNAi) 21%	<0.0001	607.0 to 1066
6G	EV(RNAi) 21% vs. nhr-67(RNAi) 21%	<0.0001	-813.2 to -367.9
6G	EV(RNAi) 0.5% vs. nhr-49(RNAi) 0.5%	<0.0001	963.7 to 1463
6G	EV(RNAi) 0.5% vs. nhr-67(RNAi) 0.5%	<0.0001	-695.9 to -200.3
7B	EV(RNAi) vs. nhr-49(RNAi)	<0.0001	144.0 to 305.3
7B	EV(RNAi) vs. hif-1(RNAi)	0.0477	0.5835 to 164.2
7B	EV(RNAi) vs. hpk-1(RNAi)	0.0001	67.65 to 232.9
7B	nhr-49(RNAi) vs. hpk-1(RNAi)	0.0835	-156.4 to 7.616
7D	EV(RNAi) vs. nhr-49(RNAi)	<0.0001	1405 to 2085
7D	EV(RNAi) vs. hif-1(RNAi)	0.0098	-755.5 to -75.30
7D	EV(RNAi) vs. hpk-1(RNAi)	<0.0001	1250 to 1960
7D	nhr-49(RNAi) vs. hpk-1(RNAi)	0.7649	-513.5 to 233.6
7E	fmo-2 WT 21% vs. WT 0.5%	0.0009	-21.06 to -4.921
7E	fmo-2 WT 0.5% vs. nhr-49(nr2041) 0.5%	0.0007	5.117 to 21.26
7E	fmo-2 WT 0.5% vs. hpk-1(pk1393) 0.5%	0.0034	3.290 to 19.43
7E	acs-2 WT 21% vs. WT 0.5%	0.0033	-10.48 to -1.795
7E	acs-2 WT 0.5% vs. nhr-49(nr2041) 0.5%	0.0007	2.757 to 11.44
7E	acs-2 WT 0.5% vs. hpk-1(pk1393) 0.5%	0.0042	1.629 to 10.31
7F	WT vs. nhr-49(nr2041)	<0.0001	32.82 to 84.83
7F	WT vs. hpk-1(pk1393)	0.0001	19.17 to 71.18
7F	WT vs. nhr-49(nr2041);hpk-1(pk1393)	<0.0001	32.44 to 84.46
7F	nhr-49(nr2041) vs. nhr-49(nr2041);hpk-1(pk1393)	>0.9999	-26.38 to 25.63
7F	hpk-1(pk1393) vs. nhr-49(nr2041);hpk-1(pk1393)	0.6929	-12.73 to 39.28
7G	WT vs. hif-1(ia4)	<0.0001	30.85 to 65.80
7G	WT vs. hpk-1(pk1393)	<0.0001	27.00 to 61.95
7G	WT vs. hif-1(ia4);hpk-1(pk1393)	<0.0001	57.72 to 92.68
7G	hif-1(ia4) vs. hif-1(ia4);hpk-1(pk1393)	0.001	9.395 to 44.35
7G	hpk-1(pk1393) vs. hif-1(ia4);hpk-1(pk1393)	0.0002	13.25 to 48.20
8A	nhr-49	0.8382	-1.230 to 1.033
8A	hpk-1	0.9428	-1.308 to 1.238
8C	NHR-49::GFP 21% vs. NHR-49::GFP 0.5%	<0.0001	-722.7 to -211.1
8C	NHR-49::GFP;hpk-1(pk1393) 21% vs. NHR-49::GFP;hpk-1(pk1393) 0.5%	0.2976	-92.90 to 481.6
8C	NHR-49::GFP 0.5% vs. NHR-49::GFP;hpk-1(pk1393) 0.5%	<0.0001	235.4 to 780.5
2 S1A	WT vs. nhr-49(nr2041)	>0.9999	-22.71 to 28.51
2 S1A	WT vs. hif-1(ia4)	>0.9999	-24.27 to 26.94
2 S1A	WT vs. nhr-49(nr2041);hif-1(ia4)	0.9345	-16.61 to 34.61
2 S1A	nhr-49(nr2041) vs. nhr-49(nr2041);hif-1(ia4)	0.9922	-19.51 to 31.71
2 S1A	hif-1(ia4) vs. nhr-49(nr2041);hif-1(ia4)	0.9713	-17.94 to 33.27
2 S1B	WT vs. nhr-49(nr2041)	>0.9999	-35.26 to 60.11
2 S1B	WT vs. hif-1(ia4)	>0.9999	-39.87 to 62.07
2 S1B	WT vs. nhr-49(nr2041);hif-1(ia4)	>0.9999	-40.93 to 54.43
2 S1B	nhr-49(nr2041) vs. nhr-49(nr2041);hif-1(ia4)	>0.9999	-49.82 to 38.47
2 S1B	hif-1(ia4) vs. nhr-49(nr2041);hif-1(ia4)	>0.9999	-52.03 to 43.33
2 S1D	NHR-49::GFP 21% vs. NHR-49::GFP 0.5%	0.0016	-556.6 to -99.43
2 S1D	NHR-49::GFP;hif-1(ia4) 21% vs. NHR-49::GFP;hif-1(ia4) 0.5%	0.0004	-581.7 to -131.7
2 S1D	NHR-49::GFP 21% vs. NHR-49::GFP;hif-1(ia4) 21%	0.1887	-405.2 to 51.88
2 S1D	NHR-49::GFP 0.5% vs. NHR-49::GFP;hif-1(ia4) 0.5%	0.0869	-430.4 to 19.64
3 S1C	WT 21% vs. WT 0.5%	0.0019	-14.23 to -3.234
3 S1C	nhr-49(nr2041) 21% vs. nhr-49(nr2041) 0.5%	0.9998	-5.932 to 5.060
3 S1C	hif-1(ia4) 21% vs. hif-1(ia4) 0.5%	0.9315	-7.015 to 3.977
3 S1C	WT 0.5% vs. nhr-49(nr2041) 0.5%	0.003	2.769 to 13.76
3 S1C	WT 0.5% vs. hif-1(ia4) 0.5%	0.0078	1.810 to 12.80
3 S2A	WT 21% vs. WT 0.5%	0.0537	-22.44 to 0.1435
3 S2A	nhr-49(nr2041) 21% vs. nhr-49(nr2041) 0.5%	>0.9999	-11.31 to 11.28
3 S2A	hif-1(ia4) 21% vs. hif-1(ia4) 0.5%	0.0016	-29.53 to -6.942
3 S2A	WT 0.5% vs. nhr-49(nr2041) 0.5%	0.0336	0.7973 to 23.38
3 S2A	WT 0.5% vs. hif-1(ia4) 0.5%	0.3099	-18.65 to 3.938
3 S2C	acs-2p::gfp 21% vs. acs-2p::gfp 0.5%	<0.0001	-2322 to -1816
3 S2C	acs-2p::gfp;nhr-49(nr2041) 21% vs. acs-2p::gfp;nhr-49(nr2041) 0.5%	0.1057	-520.4 to 33.27
3 S2C	acs-2p::gfp 0.5% vs. acs-2p::gfp;nhr-49(nr2041) 0.5%	<0.0001	2377 to 2923
4 S1A	WT vs. nhr-49(nr2041)	>0.9999	-27.38 to 25.51
4 S1A	WT vs. fmo-2(ok2147)	>0.9999	-23.51 to 29.38
4 S1A	WT vs. acs-2(ok2457)	>0.9999	-27.38 to 25.51
4 S1A	WT vs. fmo-2(ok2147);acs-2(2457)	0.9924	-18.91 to 33.98
4 S1A	fmo-2(ok2147) vs. fmo-2(ok2147);acs-2(2457)	0.9998	-21.84 to 31.04
4 S1A	acs-2(ok2457) vs. fmo-2(ok2147);acs-2(2457)	0.9829	-17.98 to 34.91
4 S1B	EV(RNAi) 21% vs. EV(RNAi) 0.5%	<0.0001	-420.6 to -131.2
4 S1B	nhr-49(RNAi) 21% vs. nhr-49(RNAi) 0.5%	>0.9999	-143.2 to 139.3
4 S1B	hif-1(RNAi) 21% vs. hif-1(RNAi) 0.5%	0.0044	-319.6 to -32.70
4 S1B	hkp-1(RNAi) 21% vs. hpk-1(RNAi) 0.5%	0.8075	-213.9 to 66.39
4 S1B	nhr-67(RNAi) 21% vs. nhr-67(RNAi) 0.5%	0.7517	-225.1 to 64.19
4 S1B	EV(RNAi) 0.5% vs. nhr-49(RNAi) 0.5%	<0.0001	95.70 to 380.7
4 S1B	EV(RNAi) 0.5% vs. hif-1(RNAi) 0.5%	0.9954	-102.4 to 186.9
4 S1B	EV(RNAi) 0.5% vs. hpk-1(RNAi) 0.5%	0.0173	15.11 to 300.1
4 S1B	EV(RNAi) 0.5% vs. nhr-67(RNAi) 0.5%	>0.9999	-141.9 to 147.4
4 S1C	EV(RNAi) 21% vs. EV(RNAi) 0.5%	<0.0001	-648.7 to -258.2
4 S1C	nhr-49(RNAi) 21% vs. nhr-49(RNAi) 0.5%	0.3058	-46.42 to 350.0
4 S1C	hif-1(RNAi) 21% vs. hif-1(RNAi) 0.5%	<0.0001	-600.8 to -201.2
4 S1C	hkp-1(RNAi) 21% vs. hpk-1(RNAi) 0.5%	0.0011	69.20 to 481.3
4 S1C	nhr-67(RNAi) 21% vs. nhr-67(RNAi) 0.5%	>0.9999	-207.4 to 207.6
4 S1C	EV(RNAi) 0.5% vs. nhr-49(RNAi) 0.5%	<0.0001	514.7 to 911.1
4 S1C	EV(RNAi) 0.5% vs. hif-1(RNAi) 0.5%	0.0596	-3.713 to 386.8
4 S1C	EV(RNAi) 0.5% vs. hpk-1(RNAi) 0.5%	<0.0001	376.6 to 773.0
4 S1C	EV(RNAi) 0.5% vs. nhr-67(RNAi) 0.5%	<0.0001	456.2 to 859.1
4 S1D	WT vs. nhr-49(nr2041)	0.9022	-16.98 to 36.32
4 S1D	WT vs. lgg-2(tm5755)	0.5406	-11.65 to 41.65
4 S1D	WT vs. nhr-49(nr2041);lgg-2(tm5755)	0.9022	-16.98 to 36.32
4 S1D	nhr-49(nr2041) vs. nhr-49(nr2041);lgg-2(tm5755)	>0.9999	-26.65 to 26.65
4 S1D	lgg-2(tm5755) vs. nhr-49(nr2041);lgg-2(tm5755)	0.996	-31.98 to 21.32
4 S1E	WT vs. nhr-49(nr2041)	0.9983	-18.96 to 26.96
4 S1E	WT vs. epg-6(tm8366)	>0.9999	-20.62 to 25.29
4 S1E	WT vs. nhr-49(nr2041);epg-6(tm8366)	0.9956	-18.29 to 27.62
4 S1E	nhr-49(nr2041) vs. nhr-49(nr2041);epg-6(tm8366)	>0.9999	-22.29 to 23.62
4 S1E	epg-6(tm8366) vs. nhr-49(nr2041);epg-6(tm8366)	>0.9999	-20.62 to 25.29
4 S1F	WT;EV(RNAi) vs. nhr-49(nr2041);EV(RNAi)	>0.9999	-38.19 to 45.85
4 S1F	WT;EV(RNAi) vs. WT;nhr-49(RNAi)	>0.9999	-36.08 to 39.08
4 S1F	WT;EV(RNAi) vs. nhr-49(nr2041);nhr-49(RNAi)	>0.9999	-34.94 to 49.10
4 S1F	WT;EV(RNAi) vs. WT;atg-10(RNAi)	>0.9999	-26.42 to 48.75
4 S1F	WT;EV(RNAi) vs. nhr-49(nr2041);atg-10(RNAi)	>0.9999	-43.69 to 40.35
4 S1F	WT;EV(RNAi) vs. WT;atg-7(RNAi)	>0.9999	-37.75 to 37.42
4 S1F	WT;EV(RNAi) vs. nhr-49(nr2041);atg-7(RNAi)	0.9461	-19.94 to 64.10
4 S1F	WT;EV(RNAi) vs. WT;bec-1(RNAi)	0.975	-19.25 to 55.92
4 S1F	WT;EV(RNAi) vs. nhr-49(nr2041);bec-1(RNAi)	0.9954	-26.53 to 65.53
4 S1F	WT;EV(RNAi) vs. WT;epg-3(RNAi)	>0.9999	-35.42 to 39.75
4 S1F	WT;EV(RNAi) vs. nhr-49(nr2041);epg-3(RNAi)	>0.9999	-37.86 to 54.20
4 S1F	WT;nhr-49(RNAi) vs. nhr-49(nr2041);nhr-49(RNAi)	>0.9999	-36.44 to 47.60
4 S1F	WT;atg-10(RNAi) vs. nhr-49(nr2041);atg-10(RNAi)	>0.9999	-54.85 to 29.19
4 S1F	WT;atg-7(RNAi) vs. nhr-49(nr2041);atg-7(RNAi)	0.9421	-19.77 to 64.27
4 S1F	WT;bec-1(RNAi) vs. nhr-49(nr2041);bec-1(RNAi)	>0.9999	-44.86 to 47.20
4 S1F	WT;epg-3(RNAi) vs. nhr-49(nr2041);epg-3(RNAi)	>0.9999	-40.03 to 52.03
4 S1G	WT;EV(RNAi) vs. nhr-49(nr2041);EV(RNAi)	0.0013	11.90 to 95.94
4 S1G	WT;EV(RNAi) vs. WT;nhr-49(RNAi)	0.0111	4.750 to 79.92
4 S1G	WT;EV(RNAi) vs. nhr-49(nr2041);nhr-49(RNAi)	0.0003	16.40 to 100.4
4 S1G	WT;EV(RNAi) vs. WT;atg-10(RNAi)	0.0004	13.92 to 89.08
4 S1G	WT;EV(RNAi) vs. nhr-49(nr2041);atg-10(RNAi)	0.0412	0.8034 to 92.86
4 S1G	WT;EV(RNAi) vs. WT;atg-7(RNAi)	0.0465	0.2501 to 75.42
4 S1G	WT;EV(RNAi) vs. nhr-49(nr2041);atg-7(RNAi)	0.0012	12.15 to 96.19
4 S1G	WT;EV(RNAi) vs. WT;bec-1(RNAi)	0.0002	14.92 to 90.08
4 S1G	WT;EV(RNAi) vs. nhr-49(nr2041);bec-1(RNAi)	<0.0001	24.40 to 108.4
4 S1G	WT;EV(RNAi) vs. WT;epg-3(RNAi)	0.0303	1.749 to 80.58
4 S1G	WT;EV(RNAi) vs. nhr-49(nr2041);epg-3(RNAi)	<0.0001	24.15 to 108.2
4 S1G	WT;nhr-49(RNAi) vs. nhr-49(nr2041);nhr-49(RNAi)	0.9989	-25.94 to 58.10
4 S1G	WT;atg-10(RNAi) vs. nhr-49(nr2041);atg-10(RNAi)	>0.9999	-50.70 to 41.36
4 S1G	WT;atg-7(RNAi) vs. nhr-49(nr2041);atg-7(RNAi)	0.9986	-25.69 to 58.35
4 S1G	WT;bec-1(RNAi) vs. nhr-49(nr2041);bec-1(RNAi)	0.9999	-28.10 to 55.94
4 S1G	WT;epg-3(RNAi) vs. nhr-49(nr2041);epg-3(RNAi)	0.8844	-18.67 to 68.67
6 S1A	nhr-67	0.832	-1.973 to 1.763
6 S1C	EV(RNAi) 21% vs. nhr-67(RNAi) 21%	0.0021	-901.5 to -151.9
6 S1C	EV(RNAi) 21% vs. EV(RNAi) 0.5%	0.0064	-895.9 to -108.3
6 S1C	nhr-67(RNAi) 21% vs. nhr-67(RNAi) 0.5%	0.0094	-870.2 to -88.61
6 S1C	EV(RNAi) 0.5% vs. nhr-67(RNAi) 0.5%	0.009	-913.1 to -94.99
6 S1D	WT;EV(RNAi) vs. WT;nhr-67(RNAi)	0.0134	3.224 to 45.28
6 S1D	nhr-49(nr2041);EV(RNAi) vs. nhr-49(nr2041);nhr-67(RNAi)	0.6251	-8.526 to 33.53
6 S1D	hif-1(ia4);EV(RNAi) vs. hif-1(ia4);nhr-67(RNAi)	0.0007	9.724 to 51.78
6 S1E	WT;EV(RNAi) vs. WT;nhr-67(RNAi)	>0.9999	-28.28 to 20.28
6 S1E	nhr-49(nr2041);EV(RNAi) vs. nhr-49(nr2041);nhr-67(RNAi)	0.9277	-34.61 to 13.95
6 S1E	hif-1(ia4);EV(RNAi) vs. hif-1(ia4);nhr-67(RNAi)	<0.0001	57.79 to 103.2
7 S1B	EV(RNAi) vs. nhr-49(RNAi)	<0.0001	815.2 to 1408
7 S1B	EV(RNAi) vs. hif-1(RNAi)	0.7964	-404.0 to 193.7
7 S1B	EV(RNAi) vs. hpk-1(RNAi)	<0.0001	418.8 to 1027
7 S1B	nhr-49(RNAi) vs. hpk-1(RNAi)	0.0077	-699.0 to -78.46
7 S1C	WT vs. nhr-49(nr2041)	0.9997	-22.31 to 29.71
7 S1C	WT vs. hpk-1(pk1393)	0.9744	-18.38 to 33.63
7 S1C	WT vs. nhr-49(nr2041);hpk-1(pk1393)	0.6287	-11.91 to 40.11
7 S1C	nhr-49(nr2041) vs. nhr-49(nr2041);hpk-1(pk1393)	0.8806	-15.61 to 36.41
7 S1C	hpk-1(pk1393) vs. nhr-49(nr2041);hpk-1(pk1393)	0.9898	-19.53 to 32.48
7 S1D	WT vs. hif-1(ia4)	>0.9999	-20.18 to 20.18
7 S1D	WT vs. hpk-1(pk1393)	0.9989	-16.75 to 23.62
7 S1D	WT vs. hif-1(ia4);hpk-1(pk1393)	0.8831	-12.32 to 28.05
7 S1D	hif-1(ia4) vs. hif-1(ia4);hpk-1(pk1393)	0.8831	-12.32 to 28.05
7 S1D	hpk-1(pk1393) vs. hif-1(ia4);hpk-1(pk1393)	0.9944	-15.75 to 24.62
8 S1B	hpk-1p::gfp 0.5% O2 vs. hpk-1p::gfp 21% O2	0.839	-105.5 to 129.6

## Sheet: Figure 1
Figure 1A
normalized mRNA fold change
	WT 21%	WT 0.5%	nhr-49(nr2041) 21%	nhr-49(nr2041) 0.5%	hif-1(ia4) 21%	hif-1(ia4) 0.5%
repeat 1	0.332048	44.0967	0.684979	3.43728	0.5097	6.87231
repeat 2	0.73508	27.1737	1.55434	1.20548	0.324878	5.9012
repeat 3	0.644668	7.40097	0.510787	0.916657	0.367657	1.11688
repeat 4	1.7519	40.756	0.268626	5.35323		9.83897
repeat 5	1.53631	103.438	1.51861	15.4875	1.20502	5.67657
Figure 1C
intestinal GFP quantification
	fmo-2p::gfp 21%	fmo-2p::gfp 0.5%	fmo-2p::gfp;nhr-49(nr2041) 21%	fmo-2p::gfp;nhr-49(nr2041) 0.5%
1	71.2917	648.817	79.058	74.632
2	99.004	604.579	78.697	74.44
3	86.021	866.232	79.933	73.587
4	60.7937	443.197	61.28	130.129
5	62.242	297.117	77.214	68.879
6	84.724	458.252	80.169	267.21
7	122.662	841.958	85.075	198.07
8	53.814	1157.15	75.034	244.297
9	436.616	601.859	92.659	552.274
10	145.727	678.358	82.303	236.144
11	85.549	797.918	106.324	194.368
12	72.907	940.509	87.584	218.97
13	157.609	479.811	112.787	199.485
14	177.309	530.24	103.839	300.245
15	123.247	1115.03	110.216	251.042
16	119.034	1465.42	98.856	268.633
17	110.207	1290.16	129.092	153.356
18	217.124	351.815	119.083	152.519
19	251.345	506.268	89.669	267.349
20	184.902	480.264	102.951	295.339
21	68.558	346.704	110.328	303.673
22	76.86	406.215	105.744	262.149
23	94.151	929.557	106.977	261.133
24	92.981	517.893	88.262	259.385
25	88.61	604.477	86.851	210.692
26	86.397	851.817	102.265	263.892
27	66.324	651.354	80.176	229.719
28	72.374	536.359	174.112	208.324
29	89.444	678.718	126.995	226.367
30	99.488	431.621	146.824	391.51
31	74.762	453.157	144.037	289.602
32	92.417		164.052	164.138
33	106.607		145.313
34	89.588		132.52
35			130.783
36			164.479
37			113.118

## Sheet: Figure 2
Figure 2A
population survival (%)
	WT	nhr-49(nr2041)	hif-1(ia4)	nhr-49(nr2041);hif-1(ia4)
repeat 1	63	33.3	11.4	0
repeat 2	88.5	11.1	18.4	0
repeat 3	96	28.6	33.3	0
repeat 4	91.7	5.6	33.3	6.9
repeat 5	91.2	41.9	30	0
Figure 2B
developmental stage (%)
	%L1	%L2	%L3	%L4	%YA	%Adult
WT 0.5%	0	0	5	82.5	12.5	0
nhr-49(nr2041) 0.5%	0	0	81.5	18.5	0	0
hif-1(ia4) 0.5%	0	23.7	55.9	20.3	0	0
nhr-49(nr2041);hif-1(ia4) 0.5%	50.7	42	7.2	0	0	0
% L4 or older for stats
	WT 0.5%	nhr-49(nr2041) 0.5%	hif-1(ia4) 0.5%	nhr-49(nr2041);hif-1(ia4) 0.5%
repeat 1	100	75	0	0
repeat 2	96.4	0	13	0
repeat 3	92.3	0	47.4	0
repeat 4	92.3			0
Figure 2C
population survival (%)
	WT	nhr-49(nr2041)	hif-1(ia4)
repeat 1	100	100	0
repeat 2	95	100	0
repeat 3	80	100	0
Figure 2E
population survival (%)
	NHR-49::GFP non-GFP sibs	NHR-49::GFP	hif-1(ia4);NHR-49::GFP non-GFP sibs	hif-1(ia4);NHR-49::GFP
repeat 1	72.5	72	43	75
repeat 2	54	83.3	27.5	54
repeat 3	68.2	76.5	26.7	45.5
repeat 4	64.5	55.5	42.9	60.6

## Sheet: Figure 3
Figure 3E
population survival (%)
	WT	nhr-49(nr2041)	fmo-2(ok2147)	acs-2(ok2457)	fmo-2(ok2147);acs-2(2457)
repeat 1	82.9	29.7	48.6	60	25
repeat 2	80	48.6	58.8	67.7	60.7
repeat 3	71.4	37.1	57.1	60	22
repeat 4	77.8	30.6	60	73	57
repeat 5	75	44.4	77.8	66.7	66.7
repeat 6	88.9	27.8			50

## Sheet: Figure 4
Figure 4B
whole worm GFP quantification
	EV(RNAi) 21%	EV(RNAi) 0.5%	nhr-49(RNAi) 21%	nhr-49(RNAi) 0.5%	hif-1(RNAi) 21%	hif-1(RNAi) 0.5%	hpk-1(RNAi) 21%	hpk-1(RNAi) 0.5%	nhr-67(RNAi) 21%	nhr-67(RNAi) 0.5%
1	1190.8	2289.99	1386.39	1051.78	868.286	2368.88	742.654	1934.47	1704.63	1081.62
2	904.352	1960.45	1989.37	1512.83	856.667	3479.45	830.46	1750.94	1802.13	2883.22
3	1573.55	2730.46	1717.31	1661.04	1699.05	1632.44	890.266	1403.72	1866.55	3390.93
4	1837.07	2714.45	1269.38	1309.8	1322.62	1992.34	1441.72	1488.42	1691.47	1107.23
5	2270.47	2842.58	1133.9	1985.29	1522.33	1997.71	851.017	1327.29	2074.37	2183.22
6	1792.59	2370.73	924.77	1644.6	1018.46	1922.01	1454.14	978.125	1247.22	2888.33
7	1365.04	2039.53	1350.73	2029.63	1657.18	1400.71	1175.07	1098.28	1869.13	2270.55
8	1374.45	1904.81	1720.79	1568.78	2011.08	2141.94	1361.15	1030.66	2642.02	3205.39
9	1599.55	1824.33	1149.56	1763.61	1340.62	1705.98	1104.62	1079.75	1064.01	2326.95
10	2363.84	1402.26	1257.75	1420.84	2531.57	1253.71	1556.62	956.304	2461.49	2138.23
11	2589.59	2090.28	786.591	1429.9	1877.79	1527.22	657.096	1191.38	2166.81	1667.47
12	1006.7	1628.39	1459.81	1356.9		1682.44	2294.66	1614.11	1400.84	2271.93
13	770.51	1944.71	672.178	1448.25	1158.43	1429.61	1313.85	1163.97	1704.02	1856.88
14	933.334	1780.7	695.599	1009.33	621.185	1769.71	1075.86	1191.56	506.901	2526.95
15	889.734	1770.82	1307.94	1251.61	1029.04	1404.87	1148.12	1300.85	1698.17	2681.14
16	399.124	1235.5	815.031	1052.21	1153.38	1780.29	1914.19	1192.21	1327.31	2893
17	675.364	1967.62	961.227	1158.57	1099.05	1488.65	2683.95	1275.12	701.025	1639.49
18	688.124	1795.69	1049.57	1457.78	2723.06	2141.7	836.484	1391.47	1397.22	1542.9
19	878.983	1388.47	1077.02	867.06	1958.89	1701.59	1272.85	1207.5	1571.15	1289.62
20	791.385	1409.62	1429.87	757.729	1706.58	1421.42	1673.72	1635.83	1572.38	1945.7
21	660.349	1651.6	1773.78	1236.8	1490.18	1359.32	1382.33	672.468	3003.88	2069.65
22	791.751	1442.58	2072.13	1183.11	1489.02	1807.32	1227.09	1080.98	2222.81	1791.28
23	2416.7	2059.44	2984.32	1773.47	1939.4	2447.67	822.291	1199.86	1054.57	2412.93
24	1490.95	1936.63	2165.09	729.021	1495.88	1921.42	1735.08	1534.83	1331.34	2510.16
25	1068.31	2723.94	1522.17	1201.46	1344.01	1892.51	1195.89	1381.32	1200.91	2613.27
26	1137.78	1549.3	1351.38	991.539	1468.43	2206.31	1132.28	1692.14	1528.11	2633.6
27	995.181	2200.01	1451.21	1246.15	2013.2	1684.85	891.004	920.469	1832.14	2532.17
28	780.381	1764.61	1579.97	1840.32	1374.53	1880.54	870.975	930.06	1112.23	1977.1
29	1561.12	2517.56	616.007	837.154	1771.93	1675.59	637.686	1467.29	1372.23	1827.2
30	1187.62	2362.36	713.64	1309.51	1727.44	1765.98	1841.83	1004.09	1009.04	1625.07
31	559.2	2649.99	493.629	774.113	1056.9	2669.21	1111.12	837.774	1066.34	2206.14
32	1206.68	2158.92	1179.94	931.294	524.36	1689.68	2180.3	440.884	1151.23	2141.92
33	2024.27		1372.42		889.218				1191.51
34	1992.74		1016.47		1722.29				1195.01
35	875.086		969.718						1366.09
36	1082.37								911.031
37	600.337
38	803.424
39	610.178
4D
# foci
	LGG-1::GFP 21%	LGG-1::GFP 0.5%	LGG-1::GFP;nhr-49(nr2041) 21%	LGG-1::GFP;nhr-49(nr2041) 0.5%	LGG-1::GFP;hif-1(ia4) 21%	LGG-1::GFP;hif-1(ia4) 0.5%
1	3	6	2	0	1	6
2	2	9	1	0	1	9
3	1	6	3	1	0	6
4	0	9	3	2	0	9
5	3	8	3	0	0	0
6	1	8	1	0	2	8
7	0	7	1	0	0	8
8	1	11	2	1	0	7
9	0	6	3	1	1	1
10	2	5	0	1	0	11
11	4	6	0	2	1	6
12	2	4	1	3	0	5
13	2	6	2	1	2	6
14	3	8	0	0	2	0
15	0	8	0	0	1	0
16	0	10	0	0	0	4
17	2	12	0	1	2	6
18	1	7	0	1	0	8
19	1	7	0	0	0	1
20	2	5	0	0	0	8
21	2	2	0	3	2	10
22	1	5	1	2	2	12
23	1	4	0	2	1	0
24	0	4	0	2	0	7
25	0	4	0	0	2	7
26	1	6	1	3	2	5
27	0	4	0	0	0	2
28	0	5	1	1	0	5
29	0	8	1	1	0	4
30	1	9	2	2	2	0
31	1	9	1	1	1	1
32	2	11	2	2	1	4
33	1	8	0	0	2	4
34	0	8	2	1	1	6
35	0	11	0	1	0	4
36	0	5	1	1	1	0
37	0	5	0	1	0	5
38	0	6	0	1	1	8
39	0	2	1	1	2	9
40	0	4	0	3	1	9
41	0	6	2	2	0	11
42	0	5	0	1	0	8
43	0	3	2	0	2	8
44	2	3	2	0	1	11
45	0	4	0	0	0	5
46	0	5	0	0	0	5
47	0	2	0	0	0	6
48	1	4	0	0	0	2
49	0	2	0	2	1	4
50	0	4	0	1	0	6
51	0	4	3	2	0	5
52	0	4	0	3	1	2
53	0	3	0	3	2	3
54	1	5	0	2	0	4
55	1	4	2	1	0	5
56	1	4	0	2	3	1
57	2	4	0	1	5	4
58	0	3	1	3	2	2
59	1	9	0	2	1	4
60	3	3	0	1	3	4
61	0	5	0	2	2	4
62	0	5	3	3	1	5
63	0	2	1	0	2	2
64	0	4	1	0	0	3
65	0	12	0	0	0	5
66	2	11	2	0	0	4
67	3	6	0	0	0	4
68	1	6	0	1	0	4
69	1	4	2	1	2	3
70	3	7	3	0	0	9
71	3	6	2	1	0	3
72	3	3	4	0	3	5
73	2	4	0	0	3	5
74	3	5	1	1	0	2
75	0	8	2	1	2	4
76	1	4	0	1	1	12
77	1	7	0	3	1	11
78	0	9	0	0	0	6
79	2	4	3	1	0	6
80	3	4	0	2	2	4
81	0	5	0	2	0	7
82	0	6	1	1	0	6
83	2	3	1	2	2	3
84	3	4	0	1	1	4
85	3	4	0	2	0	5
86	1	5	0	0	0	8
87	3	5	0	0	0	4
88	3	6	1	3	0	7
89	3	3	0	1	0	9
90	3	3	1	2	0	4
91	3	8	0	3	0	4
92	1	7	0	1	1	5
93	1	7	0	2	0	6
94	2	5	0	2	1	3
95	0	3	2	0	0	4
96	1	5	0	0	0	4
97	0	8	0	0	1	5
98	1	4	1	0	0	5
99	0	5	0	1	0	6
100	0	7	2	0	0	3
101	1	4	1	2	1	3
102	1	6	0	0	0	0
103	1	5	2	1	1	7
104	1	7	1	0	0	7
105	3	1	2	1	0	5
106	2	3	1	0	3	3
107	2	5	0	0	1	5
108	2	3	0	2	0	8
109	1	5	1	2	0	4
110	1	3	0	1	0	5
111	2	4	0	1	0	7
112			0	1	1	4
113			1	4	2	6
114			1	2	2	5
115			0	0	0	7
116			0	0	2	1
117			1	1	1	3
118			1	3	0	5
119			0	1	1	3
120			0	2	0	4
121			0	1	0	7
122			0	1	0
123			0	0	0
124			2	1	0
125			0	1	1
126			0	0	1
127			0		0
128			0		1
129			0		0
130			0		1
131			0		2
132			1		1
133			0		0
134			0		0
135			0		0
136			0		2
137			0		0
138					0
139					0
140					0
141					0
142					0
143					1
144					1
145					0
146					0
147					1
148					0
149					2
150					1
151					0
152					0
153					0
154					0
155					0
156					0
157					0
158					1
159					0
4E
population survival (%)
	WT	nhr-49(nr2041)	lgg-2(tm5755)	nhr-49(nr2041);lgg-2(tm5755)
repeat 1	89	34	63	34
repeat 2	66	31	26	31
repeat 3	74	34	35	49
4F
population survival (%)
	WT	nhr-49(nr2041)	epg-6(tm8366)	nhr-49(nr2041);epg-6(tm8366)
repeat 1	94	51	54	55
repeat 2	89	40	23	37
repeat 3	89	54	54	40
4G
# foci
	EV(RNAi) 21%	EV(RNAi) 0.5%	hpk-1(RNAi) 21%	hpk-1(RNAi) 0.5%	nhr-67(RNAi) 21%	nhr-67(RNAi) 0.5%
1	1	5	0	1	0	7
2	1	4	1	1	0	8
3	0	3	0	3	1	7
4	0	2	2	0	1	8
5	0	5	0	0	0	6
6	1	3	0	1	0	9
7	1	2	0	4	0	5
8	0	6	2	3	0	3
9	1	9	2	0	0	6
10	0	2	0	2	0	5
11	1	0	0	1	1	7
12	0	2	0	1	0	3
13	0	3	1	2	0	5
14	2	5	0	2	3	8
15	1	7	2	1	0	4
16	0	2	0	1	1	6
17	0	5	0	1	0	6
18	2	1	0	4	1	11
19	3	6	0	0	0	10
20	0	3	1	1	0	10
21	0	3	0	1	2	3
22	0	1	0	0	0	1
23	0	4	2	2	0	8
24	2	7	0	0	1	5
25	1	1	0	1	1	8
26	0	2	2	2	0	8
27	0	3	1	2	0	5
28	0	3	1	2	0	5
29	4	1	0	4	1	5
30	2	3	0	1	1	4
31	1	4	0	3	1	9
32	3	3	0	2	0	5
33	2	2	0	4	0	9
34	0	2	1	1	1	0
35	0	1	1	0	0	3
36	0	1	1	0	0	4
37	0	3	0	0	0	3
38	0	3	0	0	0	6
39	0	6	2	1	1	4
40	0	4	3	2	2	3
41	0	2	4	3	0	6
42	0	6	2	0	0	3
43	2	11	0	0	0	5
44	2	8	2	4	0	5
45	0	7	2	3	1	3
46	0	4	2	2	2	4
47	2	8	3	1	0	2
48	0	5	3	0	0	1
49	1	4	2	0	0	3
50	1	6	0	0	1	5
51	2	5	0	0	0	4
52	0	6	0	1	0	7
53	0	8	2	1	0	2
54	1	4	0	2	0	2
55	0	9	1	1	1	4
56	0	4	1	0	0	5
57	2	8	2	1	1	3
58	3	3	1	1	0	2
59	1	3	1	3	0	3
60	1	3	0	2	0	6
61	0	3	0	2	0	3
62	0	6	0	1	1	4
63	1	1	0	0	0	0
64	0	6	2	0	0	3
65	0	0	1	0	0	4
66	2	3	2	0	0	3
67	1	7	0	1	3	5
68	0	1	0	2	2	6
69	0	1	0	2	0	2
70	0	0	0	0	1	4
71	0	2	1	1	2	4
72	2	1	0	2	0	2
73	2	5	1	5	0	3
74	0	1	0	3	1	2
75	1	5	2	0	0	2
76	0	10	1	0	3	1
77	0	7	0	2	1	4
78	0	8	0	1	0	3
79	1	3	0	0	2	4
80	1	10	2	0	0	2
81	2	6	0	0	1	2
82	3	8	0	0	1	4
83	0	4	1	0	0	0
84	0	4	0	1	0	1
85	0	2	3	0	0	0
86	4	1	0	0	1	2
87	0	5	0	3	0	3
88	2	3	5	1	1	2
89	0	3	1	0	1	2
90	1	2	2	2	0	3
91	0	2	1	2	0	4
92	2	6	2	1	0	4
93	0	5	0	0	2	5
94	0	2	0	0	1	1
95	0	3	2	2	1	2
96	0	2	0	0	2	3
97	2	6	1	2	0	2
98	1	5	0	3	1	4
99	1	4	0	0	0	3
100	0	9	1	0	2	5
101	1	5	0	0	0	4
102	0	4	0	0	1	10
103	1	9	0	0	0	5
104	0	3	2	1	0	3
105	0	3	0	2	0	4
106	0	0	2	1	0	4
107	1	2		1	1	5
108	0	4		2	2	4
109	0	3		0	0	7
110	2	6		0	2	3
111	0			0	0	7
112	0			3	0	6
113	0			2	0	4
114	0			1	1	8
115	1			1	0	3
116	0			1	0	1
117	0			1	0	3
118				0	0	3
119				1	1	4
120				1	2	2
121				0	0
122				2	2
123				4	1
124				4	0
125				2	1
126				0	0
127				1	0
128				0	1
129				0	2
130				0	1
131					0
132					1
133					3
134					0
135					0
136					0
137					2
138					1
139					0

## Sheet: Figure 5
Figure 5A
population survival (%)
	WT	nhr-49(nr2041)	nhr-49(et13)
repeat 1	44	9	75
repeat 2	52	13	36
repeat 3	43	14	100
repeat 4	58	25	89
repeat 5	38	6	69
Figure 5B
population survival (%)
	intestinal nhr-49 rescue	intestinal nhr-49 rescue non-GFP sibs	hypodermal nhr-49 rescue	hypodermal nhr-49 rescue non-GFP sibs	neuronal nhr-49 rescue	neuronal nhr-49 rescue non-GFP sibs	endogenous nhr-49 rescue	endogenous nhr-49 rescue non-GFP sibs	BWM nhr-49 rescue	BWM nhr-49 rescue non-GFP sibs
repeat 1		0		5.9		15.6		0	32	0
repeat 2	70.4	41.2	91.7	21.1	60	26.8	66.7	27.8	76	11
repeat 3	88.6	66.7		56	80	76.5	78	24	78	34
repeat 4		59.3	66.7	74.6		52.7	56.5	63.4	74	23
repeat 5	50	17.1		45.5	70.6	44.4		56.1
repeat 6	80.6	9.4	80.8	53.3	65	67.7	73.1	25.6
repeat 7			80	68.8	83.3	35
Figure 5C
normalized mRNA fold change
	WT			nhr-49(et13)
	repeat 1	repeat 2	repeat 3	repeat 1	repeat 2	repeat 3
acs-2	1.27439	0.704003	1.0216	17.8622	2.91183	12.9184
oac-14	1.47931	0.859652	0.661037	0.899375	0.314773	0.255872
fmo-2	0.57483	0.628581	1.79659	30.5004	10.9249	5.2712
cyp-13a11	0.692592	1.339	0.968407	0.197911	0.0557722	0.0245532
cyp-25a3	2.49519	0.158781	0.346028	11.2455	2.73008	0.710256
ugt-20	0.988214	0.819335	1.19245	1.10608	0.851294
atg-2	1.02409	0.877972	1.09794	1.17246	0.824101	0.756294
epg-9	1.34363	0.56345	1.09292	1.59631	0.929938	0.914696
lgg-2	1.252	0.485869	1.26213	1.22076	0.76828	0.772238
atg-13	1.27268	0.727482	0.999835	1.9409	0.502154	1.00001

## Sheet: Figure 6
Figure 6A
transcript level (CPM)
	WT 21%	WT 0.5%	nhr-49(nr2041) 21%	nhr-49(nr2041) 0.5%	hif-1(ia4) 21%	hif-1(ia4) 0.5%
repeat 1	1.62452	2.60493	1.4538	6.24165	1.62064	2.95776
repeat 2	1.47804	1.88363	1.31914	4.99609	1.38745	2.45167
repeat 3	0.656818	1.35128	1.26254	3.26778	0.693826	1.22695
Figure 6C
intestinal GFP quantification
	EV(RNAi) 21%	nhr-67(RNAi) 21%	EV(RNAi) 0.5%	nhr-67(RNAi) 0.5%	nhr-49(nr2041);EV(RNAi) 21%	nhr-49(nr2041);nhr-67(RNAi) 21%	nhr-49(nr2041);EV(RNAi) 0.5%	nhr-49(nr2041);nhr-67(RNAi) 0.5%
1	299.537	318.369	388.818	2937.76	229.523	174.487	224.207	161.575
2	295.674	551.462	473.931	394.969	211.146	278.607	199.264	232.452
3	289.844	488.517	375.86	370.448	198.968	232.326	202.564	205.742
4	289.765	499.043	468.639	1101.11	257.934	228.998	218.976	184.823
5	315.775	516.207	383.001	2592.83	186.867	181.268	199.687	188.161
6	257.054	2605.4	387.585	390.665	281.02	194.606	236.352	230.761
7	267.6	427.458	366.481	466.924	213.902	162.335	198.08	211.098
8	226.791	376.812	541.344	450.962	296.266	250.015	214.594	196.296
9	329.197	275.397	495.57	312.944	198.297	195.428	206.92	213.17
10	362.208	881.298	577.64	693.134	242.805	241.903	236.593	266.876
11	322.301	194.859	295.062	2496.36	205.739	239.345	119.62	199.574
12	308.433	263.686	358.629	1581.31	147.041	182.788	131.298	220.625
13	285.449	576.165	365.197	676.631	160.07	174.958	138.702	161.581
14	286.046	388.254	357.797	364.397	157.716	198.683	151.18	122.888
15	268.926	306.226	400.423	1132.85	147.56	176.634	170.005	119.549
16	224.995	228.405	416.582	1949.1	188.172	135.489	130.347	113.529
17	314.93	267.391	398.741	2679.15	130.648	129.224	120.284	129.03
18	241.143	417.801	320.385	411.74	192.834	125.524	178.957	145.601
19	237.006	1040.54	460.466	1270.94	155.71	188.029	140.784	144.723
20	247.692	612.966	932.69	1296.23	157.609	169.771	116.628	191.738
21	207.116	333.894	401.805	696.296	119.842	186.592	209.256	122.112
22	225.355	334.618	356.101	648.539	154.654	222.814	249.686	214.86
23	288.588	411.485	423.224	528.989	95.968	215.384	183.311	234.892
24	241.37	292.102	533.459	845.068	136.326	100.999	255.939	228.366
25	183.114	317.518	414.441	586.71	176.607	166.812	240.313	236.954
26	215.793	355.218	464.484	556.082	177.841	161.425	275.678	225.453
27	206.574	1307.34	386.047	1542.23	105.811	186.23	255.362	303.409
28	191.237	439.44	462.71	948.881	161.518	157.52	227.818	346.736
29	131.694	487.073	502.133	1073.02	144.54	195.717	201.945	249.624
30	199.61	993.955	274.87	532.692	134.024	214.047	186.24	264.672
31	218.478	809.204	878.962	420.946	150.668	236.614	227.579	229.691
32	309.882		535.195		118.259	201.052	266.177	208.374
33	297.843		357.147		152.325	188.636	215.288	206.563
34	323.56		382.082		118.451	142.032	176.688
35	268.099		590.676		169.412	208.83
36	297.925		510.589		151.831	160.672
37	226.916		497.082		94.445	167.836
38	243.342		398.47		90.326
39	213.817		624.109		85.605
40	240.081		693.901		114.298
41	218.253		383.348
42	255.158
43	233.422
44	235.456
45	149.492
Figure 6E
intestinal GFP quantification
	EV(RNAi) 21%	nhr-67(RNAi) 21%	EV(RNAi) 0.5%	nhr-67(RNAi) 0.5%	nhr-49(nr2041);EV(RNAi) 21%	nhr-49(nr2041);nhr-67(RNAi) 21%	nhr-49(nr2041);EV(RNAi) 0.5%	nhr-49(nr2041);nhr-67(RNAi) 0.5%
1	2069.83	2958.97	3320.97	2663.8	480.278	703.645	884.455	784.123
2	1908.33	882.68	3520.6	3388.78	1345.68	1265.16	568.379	575.286
3	3060.58	2963.71	3378.95	3061.23	377.724	715.106	816.623	840.603
4	2173.85	1917.19	3615.62	3684.11	292.298	811.946	534.827	1061.66
5	2935.72	1854.34	2593.97	3589.69	815.933	520.085	1272.38	830.456
6	2793.79	3098.8	3051.45	3431.42	698.376	697.176	637.833	660.56
7	1635.84	2257.2	2295.31	3569.61	754.686	981.27	1055.54	565.624
8	1946.3	2965.87	2953.76	3088.04	1012.04	407.797	973.044	663.408
9	1175.72	3114.65	2772.9	3676.58	780.696	601.214	974.591	605.959
10	1684.24	1903.41	2864.04	3679.24	803.394	510.684	592.587	836.473
11	3356.65	1652.02	3152.26	3293.35	515.207	936.066	372.826	271.056
12	1129.52	3257.95	3511.52	3658.43	551.23	848.912	730.512	480.178
13	1426.48	1198.96	2371.68	3661.28	818.691	419.275	313.075	481.937
14	1628.62	3455.58	2580.82	3505.83	732.824	623.533	577.722	532.508
15	1240.66	2714.91	3285.74	3519.97	1678.18	173.837	569.216	830.391
16	1332	3093.81	3398.12	3474.12	364.593	751.901	381.091	1013.39
17	1257.72	2713.09	3640.95	3662.93	167.897	573.141	592.906	418.099
18	817.52	3024	2312.58	3501.89	240.465	331.786	578.933	558.598
19	2661.24	1525.54	2549.84	3629.07	118.079	793.97	763.773	540.593
20	1466.38	3142.78	3425.06	3572.88	126.09	588.3	458.227	700.232
21	3616.3	2195.11	2911.56	3347.04	525.424	712.396	708.585	421.056
22	3387.11	2175.73	3479.89	3410.59	733.794	723.389	377.114	566.216
23	1994.21	3615.16	3202.23	3439.88	778.68	309.7	583.066	1096.44
24	3434.48	2542.34	3170.33	3300.06	612.441	749.573	929.045	1019.21
25	1155.98	3204.42	3173.41	3466.85	436.126	531.955	1084.65	843.857
26	997.12	3364.69	3148.9	3532.62	1107.1	933.609	994.356	1323.56
27	3576.3	3023.88	3217.2	3606.35	557.173	463.83	727.943	933.121
28	2157.14	3273.93	3093.49	3550.52	381.379	271.416	998.731	1016.96
29	2349.31	3149.94	3233.75	3608	858.604	562.759	935.18	1302.82
30	3544.65	3302.4	3021.81	3545.88	1432.8	880.789	911.548	689.693
31	2535.44	3276.3	3135.42	3477.01	340.459	919.119	901.864	845.74
32	3608.94	3356.68	3112.12	3261.72	755.526	674.563	451.84
33	3375.51	3335.04	3200.11			696.179
34	3303.66	3324.39				1249.91
35	2604.66	3564.08				821.713
36	2890.34	3579.53
37	1607.16	3566.39
38	2820.99
Figure 6G
whole worm GFP quantification
	EV(RNAi) 21%	EV(RNAi) 0.5%	nhr-49(RNAi) 21%	nhr-49(RNAi) 0.5%	nhr-67(RNAi) 21%	nhr-67(RNAi) 0.5%
1	1563.15	1824.67	389.242	752.2	2247.54	2381.89
2	1204.51	1785.29	361.535	476.125	1880.44	2298.9
3	1611.68	1198.41	552.874	780.867	2242.04	2562.9
4	1418.35	1603.81	371.426	990.702	2341.77	2846.89
5	1416.98	1541.75	508.284	622.02	1839.6	2267.46
6	1630.26	2134.27	523.495	454.858	2286.54	2164.43
7	1964.68	3037.16	645.05	806.707	1689.85	3326.48
8	1411.55	1462.58	788.171	363.108	2268.18	2123.05
9	1285	1720.58	947.322	333.83	2387.92	2254.97
10	1897.69	1217.74	1227.84	464.18	2250.43	2252.6
11	734.788	1896.41	706.589	396.743	1512.44	1752.27
12	1448.83	1505.5	685.687	891.028	1243.04	2432.03
13	1224.63	1436.46	622.594	428.699	2476.92	1886.59
14	1507.81	2064.59	342.85	511.342	2501.34	2505.91
15	1156.8	1488.96	397.829	814.598	1938.76	1664.34
16	1499.98	1944.86	791.839	373.227	1778.81	1706.61
17	1613.99	1848.29	520.994	256.084	1964.61	1869.74
18	1326.31	1528.73	268.405	438.78	2029.96	2817.05
19	1290.22	1932.32	341.63	1083.91	1444.34	2107.8
20	946.703	2283.61	377.982	476.535	2653.72	2373.7
21	1507.37	2114.86	520.937	487.151	1772.6	1902.56
22	1315.44	1725.76	603.599	275.091	2497.84	1412.46
23	1071.27	1933.42	340.554	304.442	2206.32	2418.15
24	1304.58	1340.86	411.749	809.932	2150.65	2117.8
25	1268.86	1826.3	275.068	391.576	2424.08	1799.69
26	1371.09	2763.86	328.703	445.664	2087.2	2320.78
27	1312.12	1642.27	454.014	976.184	1690	2341.53
28	1480.92	1169.62	652.494	662.16	2008.7	2864.4
29	1631.3	2295.49	450.209	349.438	1500.35	1795.45
30	993.266	1192.91	509.353	639.55	1619.9	2357.55
31	1210.03		314.45		1745.12	2208.89
32	1431.49		342.681		1139.81
33	766.613		496.46		2152.06
34	1410.51		812.535		2023.88
35	1424.88		436.89		2034.11
36			575.324		1559.21
37					2405.79
38					1409.97
39					1753.88
40					1050.85
41					1826.3

## Sheet: Figure 7
Figure 7B
intestinal GFP quantification
	EV(RNAi)	nhr-49(RNAi)	hif-1(RNAi)	hpk-1(RNAi)
1	1210.99	158.485	455.905	149.49
2	688.14	180.365	262.747	229.918
3	365.494	202.837	249.44	256.013
4	885.163	196.939	244.401	344.679
5	317.86	198.311	476.23	283.47
6	393.456	173.581	453.672	375.492
7	371.698	204.984	474.556	293.46
8	345.55	174.094	362.571	475.951
9	303.512	231.165	361.928	270.189
10	490.027	192.531	318.683	205.9
11	310.96	156.369	226.38	318.013
12	334.158	195.041	526.9	315.502
13	323.234	133.667	385.041	414.354
14	336.967	162.173	238.747	310.475
15	416.089	228.98	264.876	268.94
16	350.122	248.334	571.017	289.837
17	319.834	242.889	303.454	328.322
18	514.191	240.741	303.791	317.465
19	310.614	248.866	325.232	271.023
20	291.08	203.877	282.339	247.179
21	352.019	219.998	225.694	314.457
22	324.995	215.558	295.976	316.344
23	400.059	263.016	244.492	289.799
24	411.824	231.199	314.037	261.391
25	1053.81	263.644	407.997	288.816
26	429.317	208.809	451.308	245.092
27	382.244	274.479	489.794	259.218
28	397.106	315.775	353.664	233.4
29	639.35	232.582	289.657	296.701
30	310.8	371.54	490.663	335.405
31	345.577	267.077	539.789
32	275.8	236.982	499.041
33		156.78	409.525
34			273.523
35			277.149
Figure 7D
intestinal GFP quantification
	EV(RNAi)	nhr-49(RNAi)	hif-1(RNAi)	hpk-1(RNAi)
1	2151.43	108.813	3263.53	484.291
2	3210.49	262.606	3369.58	597.887
3	2086.88	816.04	3199.27	2234.18
4	2788.31	621.461	3122.79	868.98
5	2225.41	395.887	3195.69	871.242
6	1935.35	854.519	3469.97	895.433
7	2301.46	479.669	3391.26	1097.6
8	2797.87	600.522	3485.41	1253.87
9	2366.95	1195.48	3335.52	1138.67
10	3380.15	926.798	3456.89	1781.57
11	1987.68	717.382	3156.11	2416.66
12	2805.02	480.394	3418.03	2125.04
13	1551.27	1099.97	3202.09	802.76
14	2898.98	1372.28	2771.83	834.283
15	1899.63	873.074	3493.53	1201.57
16	2481.22	767.871	3647.85	1845.66
17	1556.86	769.896	3362.92	932.888
18	1572.6	2369.05	3449.22	1347.36
19	1487.58	529.208	2991.22	1107.96
20	2625.45	483.532	3476.97	1334.08
21	3626.37	2578.36	3041.7	979.701
22	3560.64	1830.86	3691.61	858.199
23	3334.21	1710.05	3676.08	598.602
24	3322.22	2913.38	3611.4	1249.03
25	3536.81	1581.27	3548.97	1477.1
26	3551.39	1065.37	3634.58	1085.58
27	3217.75	802.045	3725.84	2775.99
28	3315.16	1674.74	3751.64	2815.1
29	3267.29	2163.48	3149.89	1292.19
30	3445.3	2099.93	2976.24	1623.41
31	3546.22	1564.82	3404.91	1952.06
32	3291.23	1358	3195.66	1167.21
33	3624.91	1073.82	3691.58
34	3486.82	1376.97	2848.35
35	3369.91	2388.26	3340.01
36	3526.64	1239.67	3556.43
37	3649.89	1449.22	3418.39
38	3462.86
39	3438.96
40	3462.58
41	3458.26
42	2749.32
43	3250.47
44	3692.74
45	3685.99
46	3706.24
47	2963.5
Figure 7E
normalized mRNA fold change
	WT 21%				WT 0.5%				nhr-49(nr2041) 21%				nhr-49(nr2041) 0.5%				hpk-1(pk1393) 21%				hpk-1(pk1393) 0.5%
	repeat 1	repeat 2	repeat 3	repeat 4	repeat 1	repeat 2	repeat 3	repeat 4	repeat 1	repeat 2	repeat 3	repeat 4	repeat 1	repeat 2	repeat 3	repeat 4	repeat 1	repeat 2	repeat 3	repeat 4	repeat 1	repeat 2	repeat 3	repeat 4
fmo-2	0.270995	2.39887	0.968635	0.361503	7.66991	25.7582	10.9973	11.5434	0.0939478	0.123354	0.420584	5.64611	0.243444	0.215526	0.852154	1.90277	0.151736	0.0591643	0.362627	0.212869	4.78447	1.14658	3.83584	0.754422
acs-2	1.22519	0.12959	2.61536	0.0298597	12.8362	3.16699	7.95995	4.58572	0.033413	0.0513691	0.0392694	0.0294927	0.0218319	0.0151761	0.0254127	0.0919849	0.17103	0.0750207	0.321606	0.0543054	0.814356	0.298897	3.46916	0.0819469
Figure 7F
population survival (%)
	WT	nhr-49(nr2041)	hpk-1(pk1393)	nhr-49(nr2041);hpk-1(pk1393)
repeat 1	100	24	55	17
repeat 2	92	46	70	57
repeat 3	77	28	23	27
repeat 4	92.1	27.8	32.4	26.3
Figure 7G
population survival (%)
	WT	hif-1(ia4)	hpk-1(pk1393)	hif-1(ia4);hpk-1(pk1393)
repeat 1	82.9	14.3	37.5	8.1
repeat 2	80	41.9	43.3	3.2
repeat 3	71.4	43.2	25.6	0
repeat 4	77.8	19.4	27.8	0

## Sheet: Figure 8
Figure 8A
normalized mRNA fold change
	WT 21%				WT 0.5%
	repeat 1	repeat 2	repeat 3	repeat 4	repeat 1	repeat 2	repeat 3	repeat 4
nhr-49	1.2943	0.612149	0.183495	1.91006	1.30555	0.754113	0.218639	1.32748
hpk-1	1.35843	1.31203	0.329541		1.37053	1.1744	0.350002
Figure 8C
worm worm GFP quantification
	NHR-49::GFP 21%	NHR-49::GFP 0.5%	NHR-49::GFP;hpk-1(pk1393) 21%	NHR-49::GFP;hpk-1(pk1393) 0.5%
1	1655.76	1514.09	1755	2219.69
2	1902.98	2473.84	1686.43	2148.97
3	1455.11	2710.29	1809.94	1902.82
4	1679.71	1642.56	1654.29	1065.48
5	910.824	2194.88	2466.01	1483.53
6	1418.9	866.161	1712.98	1381.7
7	1569.05	1989.27	1933.69	1630.29
8	1354.73	988.934	1556.85	1007.04
9	1154.12	1878.99	1490.72	1195.54
10	1470.27	1511.5	1117.8	1266.87
11	154.887	1546.51	1704.02	1508.2
12	1620.21	1312.41	869.848	1393.28
13	1971.11	1860.98	1288.08	958.481
14	1448.06	2612.14	1572.15	1441.51
15	1328.82	1203.2	2466.01	906.298
16	1151.16	1130.05	1534.64	1646.46
17	1548.93	1453.3	1742.93	1026.99
18	1887.72	1752.3	1373.98	989.569
19	1338.15	1419.32	1687.79	1051
20	1700.19	1880.44	1040.48	1037.7
21	1865.77	1356	1194.44	1089.73
22	1543.45	1353.82	1291.97	1301.42
23	1359.93	1987.02	1072.37	860.521
24	1701.64	1496.92	2018.27	1444.19
25	1819.58	1447.25	1419.02	2368.36
26	1318.56	1794.18	1370.29	1647.56
27	799.563	2548.52	1694.45	2130.07
28	1284.74	2779.12	2350.95	1717.2
29	985.396	2662.33	1140.74	1577.97
30	1819.47	3069.8	2213.76	1311.35
31	1585.56	2392.84	1817.04	1056.52
32	1842.35	2305.82	2374.32
33	1393.34	1586.34	1077.19
34	1431.9	1859.18	1111.96
35	1361.54	1956
36	1657.27	2117.74
37	1726.15	2342
38	1400.18	2268.62
39	1044.08	1937.79
40		1823.5
41		2267.67
42		3008.46
43		2247.7

## Sheet: Figure 2—figure supplement 1
Figure 2—figure supplement 1
A
population survival (%)
	WT	nhr-49(nr2041)	hif-1(ia4)	nhr-49(nr2041);hif-1(ia4)
repeat 1	100	100	100	97.3
repeat 2	100	93.2	96	88.4
repeat 3	100	98.1	100	87.3
B
developmental stage (%)
	%L1	%L2	%L3	%L4	%YA	%Adult
WT 21%	0	0	0	6.9	51.4	42
nhr-49(nr2041) 21%	0	0	12.3	72.3	15.4	0
hif-1(ia4) 21%	0	0	7.5	16.4	58.2	18
nhr-49(nr2041);hif-1(ia4) 21%	0	0	7.1	78.6	14.3	0
% L4 or older for stats
	WT 21%	nhr-49(nr2041) 21%	hif-1(ia4) 21%	nhr-49(nr2041);hif-1(ia4) 21%
repeat 1	100	81.3	66.7	100
repeat 2	100	93.3	100	81.3
repeat 3	100	90	100	100
repeat 4		85.7		91.7
D
worm worm GFP quantification
	NHR-49::GFP 21%	NHR-49::GFP 0.5%	NHR-49::GFP;hif-1(ia4) 21%	NHR-49::GFP;hif-1(ia4) 0.5%
1	746.069	718.771	862.386	1872.03
2	601.386	463.363	907.762	1127.88
3	554.069	461.353	380.188	1601.79
4	1036.81	365.04	1329.03	1070.64
5	414.447	931.708	510.192	662.693
6	410.418	1338.62	410.641	1094.64
7	496.365	1086.82	458.995	1255.02
8	266.967	427.812	977.266	591.764
9	327.416	1719.68	522.598	1515.91
10	388.414	1601.95	524.391	1004.5
11	1082.06	843.78	1144.11	715.331
12	681.776	1432.8	1129.36	903.324
13	757.868	697.654	508.079	1820.44
14	609.482	1682.28	943.716	2139.05
15	757.879	1191.17	1144.07	1008.4
16	756.09	1044.89	1144.43	632.022
17	890.774	1265.57	1142	1289.66
18	802.588	679.846	843.288	2045.94
19	461.472	702.195	1001.28	1126.22
20	933.319	696.9	881.923	881.219
21	862.862	600.693	916.757	967.777
22	723.373	531.112	319.905	1315.28
23	386.541	756.709	972.416	931.271
24	748.011	527.053	895.859	879.018
25	289.601	1704.4	471.422	1054.79
26	585.745	779.499	560.222	882.391
27	298.745	757	1076.45	1494.27
28	342.29	1290.01	549.983	1227.41
29	491.439	753.645	755.402	1023.28
30	411.646	749.173	482.245	834.673
31	694.852	1721.88	697.316	678.609
32		390.114	607.807	1255.33
33				723.226

[truncated: 6 more sheets: Figure 3—figure supplement 1, Figure 3—figure supplement 2, Figure 4—figure supplement 1, Figure 6—figure supplement 1, Figure 7—figure supplement 1, Figure 8—figure supplement 1]
