# Supplementary material for: Nuclear hormone receptor NHR-49 acts in parallel with HIF-1 to promote hypoxia adaptation in Caenorhabditis elegans
Source: eLife. 2022 Mar 14;11:e67911. doi: 10.7554/eLife.67911 (PMC8959602; doi:10.7554/eLife.67911)
Supplement: Supplementary file 3. — (a) List of the 83 genes significantly upregulated more than twofold in 21% O2 vs. 0.5% O2 in wild-type and hif-1(ia4) animals, but not in nhr-49(nr2041) animals, i.e., nhr-49-dependent, hif-1-independent genes. (b) List of 139 genes significantly upregulated more than twofold in 21% O2 vs. 0.5% O2 in wild-type and nhr-49(nr2041) animals, but not in hif-1(ia4) animals, i.e., hif-1-dependent, nhr-49-independent genes. (c) List of 264 genes significantly upregulated more than twofold in 21% O2 vs. 0.5% O2 via RNA-seq in wild-type, nhr-49(nr2041), and hif-1(ia4). [file elife-67911-supp3.xlsx]

## Sheet: Supplementary File 3a
Gene Name	WormBase Gene ID	Sequence Name	Other Name	Transcript	WormCat Category 2	WormCat Category 3	NCBI WBcel235 WS277 description
abhd-5.1	WBGene00016506	C37H5.2	CELE_C37H5.2	C37H5.2.1	Unknown	Unknown	Abhydrolase domain-containing protein abhd-5.1
acs-2	WBGene00009221	F28F8.2	CELE_F28F8.2	F28F8.2.1	Metabolism: lipid	Metabolism: lipid	fatty Acid CoA Synthetase family
akt-2	WBGene00000103	F28H6.1	CELE_F28H6.1	F28H6.1a.1, F28H6.1b.1	Signaling: AKT	Signaling: AKT	Serine/threonine-protein kinase akt-2
atg-2	WBGene00019748	M03A8.2	CELE_M03A8.2	M03A8.2.1, M03A8.2.2	Lysosome: autophagy	Lysosome: autophagy	AuTophaGy (yeast Atg homolog)
B0228.6	WBGene00015063	B0228.6	CELE_B0228.6	B0228.6.1	Unknown	Unknown	Uncharacterized protein CELE_B0228.6
B0403.3	WBGene00015167	B0403.3	CELE_B0403.3	B0403.3.1, B0403.3.2	Unknown	Unknown	Uncharacterized protein CELE_B0403.3
C01B4.7	WBGene00015271	C01B4.7	CELE_C01B4.7	C01B4.7b, C01B4.7a.1, C01B4.7c.1, C01B4.7d.1	Unknown	Unknown	Uncharacterized protein CELE_C01B4.7
C06E4.6	WBGene00015535	C06E4.6	CELE_C06E4.6	C06E4.6.1	Metabolism: lipid	Metabolism: lipid	Uncharacterized protein CELE_C06E4.6
C18B12.4	WBGene00007666	C18B12.4	CELE_C18B12.4	C18B12.4.1	Proteolysis proteasome: E3	Proteolysis proteasome: E3	Uncharacterized protein CELE_C18B12.4
C25F9.11	WBGene00045411	C25F9.11	CELE_C25F9.11	C25F9.11.1	Unknown	Unknown	Uncharacterized protein CELE_C25F9.11
C33A11.2	WBGene00007878	C33A11.2	CELE_C33A11.2	C33A11.2.1	Development: apoptosis	Development: apoptosis	Uncharacterized protein CELE_C33A11.2
C33A12.3	WBGene00007882	C33A12.3	CELE_C33A12.3	C33A12.3a.1, C33A12.3b.1	Unknown	Unknown	Uncharacterized protein CELE_C33A12.3
C42D4.1	WBGene00016594	C42D4.1	CELE_C42D4.1	C42D4.1.1			Uncharacterized protein CELE_C42D4.1
C49G7.12	WBGene00077593	C49G7.12	CELE_C49G7.12	C49G7.12a.1, C49G7.12b.1	Unknown	Unknown	Uncharacterized protein CELE_C49G7.12
C49G7.7	WBGene00016785	C49G7.7	CELE_C49G7.7	C49G7.7.1, C49G7.7.2	Unknown	Unknown	Uncharacterized protein CELE_C49G7.7
C50F7.5	WBGene00016845	C50F7.5	CELE_C50F7.5	C50F7.5.1	Unknown	Unknown	Uncharacterized protein CELE_C50F7.5
cbp-3	WBGene00009595	F40F12.7	CELE_F40F12.7	F40F12.7.1, F40F12.7.2, F40F12.7.3	Transcription: chromatin modification	Transcription: chromatin modification	CBP/p300 homolog
cup-16	WBGene00007919	C34C6.7	CELE_C34C6.7	C34C6.7a.1, C34C6.7b.1	Trafficking: endocytosis	Trafficking: endocytosis	Uncharacterized protein CELE_C34C6.7
cyp-13A11	WBGene00008809	F14F7.2	CELE_F14F7.2	F14F7.2.1	Stress response: detoxification	Stress response: detoxification	CYtochrome P450 family
cyp-13A5	WBGene00011672	T10B9.2	CELE_T10B9.2	T10B9.2.1	Stress response: detoxification	Stress response: detoxification	Putative cytochrome P450 CYP13A5
cyp-13A6	WBGene00011673	T10B9.3	CELE_T10B9.3	T10B9.3.1	Stress response: detoxification	Stress response: detoxification	Putative cytochrome P450 CYP13A6
cyp-25A3	WBGene00014697	C36A4.3	CELE_C36A4.3	C36A4.3.1, C36A4.3.2	Stress response: detoxification	Stress response: detoxification	CYtochrome P450 family
cyp-34A9	WBGene00015044	B0213.15	dod-16, ccp-34A9, CELE_B0213.15	B0213.15a.1, B0213.15b.1, B0213.15c.1, B0213.15d.1	Stress response: detoxification	Stress response: detoxification	CYtochrome P450 family
cyp-35A1	WBGene00015399	C03G6.14	CELE_C03G6.14	C03G6.14.1	Stress response: detoxification	Stress response: detoxification	CYtochrome P450 family
cyp-37B1	WBGene00009226	F28G4.1	CELE_F28G4.1	F28G4.1.1	Stress response: detoxification	Stress response: detoxification	CYtochrome P450 family
cyp-43A1	WBGene00017108	E03E2.1	CELE_E03E2.1	E03E2.1.1	Stress response: detoxification	Stress response: detoxification	CYtochrome P450 family
EEED8.2	WBGene00017133	EEED8.2	CELE_EEED8.2	EEED8.2.1	Unknown	Unknown	Uncharacterized protein CELE_EEED8.2
epg-9	WBGene00022078	Y69A2AR.7	CELE_Y69A2AR.7	Y69A2AR.7a.1, Y69A2AR.7b.1, Y69A2AR.7c.1	Lysosome: autophagy	Lysosome: autophagy	Ectopic P Granules
F13E9.15	WBGene00045208	F13E9.15	CELE_F13E9.15	F13E9.15.1	Unknown	Unknown	Uncharacterized protein CELE_F13E9.15
F16B12.4	WBGene00008880	F16B12.4	CELE_F16B12.4	F16B12.4.1	Unknown	Unknown	Uncharacterized protein CELE_F16B12.4
F16C3.2	WBGene00008886	F16C3.2	CELE_F16C3.2	F16C3.2.1	Unknown	Unknown	Uncharacterized protein CELE_F16C3.2
F20B6.7	WBGene00017631	F20B6.7	CELE_F20B6.7	N.A.	Unknown	Unknown	Uncharacterized protein CELE_F20B6.7
F22F7.4	WBGene00017722	F22F7.4	CELE_F22F7.4	F22F7.4b, F22F7.4a.1, F22F7.4c.1	Unknown	Unknown	Uncharacterized protein CELE_F22F7.4
F35E8.2	WBGene00009418	F35E8.2	CELE_F35E8.2	F35E8.2.1	Unknown	Unknown	Uncharacterized protein CELE_F35E8.2
F43G6.8	WBGene00009660	F43G6.8	CELE_F43G6.8	F43G6.8.1	Proteolysis proteasome: E3	Proteolysis proteasome: E3	Uncharacterized protein CELE_F43G6.8
F59C6.16	WBGene00077764	F59C6.16	CELE_F59C6.16	F59C6.16.1	Unknown	Unknown	Uncharacterized protein CELE_F59C6.16
faah-2	WBGene00015048	B0218.2	CELE_B0218.2	B0218.2.1	Metabolism: lipid	Metabolism: lipid	Fatty Acid Amide Hydrolase homolog
fbxa-98	WBGene00007453	C08F11.5	CELE_C08F11.5	C08F11.5a.1, C08F11.5b.1	Proteolysis proteasome: E3	Proteolysis proteasome: E3	F-box A protein
fbxa-99	WBGene00009490	F36G9.14	CELE_F36G9.14	F36G9.14.1	Proteolysis proteasome: E3	Proteolysis proteasome: E3	F-box A protein
fmo-2	WBGene00001477	K08C7.5	fmo-12, CELE_K08C7.5	K08C7.5.1	Metabolism: FMO	Metabolism: FMO	Dimethylaniline monooxygenase
gba-2	WBGene00016340	C33C12.8	CELE_C33C12.8	C33C12.8.1	Metabolism: lipid	Metabolism: lipid	Putative glucosylceramidase 2
icl-1	WBGene00001564	C05E4.9	gei-7, CELE_C05E4.9	C05E4.9a.1, C05E4.9b.1	Metabolism: glycolysis	Metabolism: glycolysis	Malate synthase
K09D9.1	WBGene00019564	K09D9.1	CELE_K09D9.1	K09D9.1.1	Unknown	Unknown	Uncharacterized protein CELE_K09D9.1
K09E9.1	WBGene00010724	K09E9.1	CELE_K09E9.1	K09E9.1a.1, K09E9.1a.2, K09E9.1b.1, K09E9.1c.1	Transmembrane transport: solute carrier	Transmembrane transport: solute carrier	Uncharacterized protein CELE_K09E9.1
lgc-1	WBGene00020236	T05B4.1	CELE_T05B4.1	T05B4.1.1	Transmembrane transport: extracellular ligand gated channel	Transmembrane transport: extracellular ligand gated channel	Ligand-Gated ion Channel
lgg-2	WBGene00002981	ZK593.6	atg-8.2, CELE_ZK593.6	ZK593.6a.1, ZK593.6b.1	Lysosome: autophagy	Lysosome: autophagy	Protein lgg; Protein lgg-2
M01A8.1	WBGene00010795	M01A8.1	CELE_M01A8.1	M01A8.1a.1, M01A8.1b.1, M01A8.1c.1	Unknown	Unknown	Uncharacterized protein CELE_M01A8.1
mfb-1	WBGene00008439	DY3.6	tag-220, CELE_DY3.6	DY3.6.1	Proteolysis proteasome: E3	Proteolysis proteasome: E3	MAFBx (F-box) protein homolog
mnk-1	WBGene00011304	R166.5	CELE_R166.5	R166.5a.1, R166.5b.1, R166.5b.2, R166.5b.3	Signaling: MAPK	Signaling: MAPK	MAP kinase-interacting serine/threonine-protein kinase mnk-1
nhl-3	WBGene00003599	W04H10.3	CELE_W04H10.3	W04H10.3a.1, W04H10.3b.1, W04H10.3c.1, W04H10.3d.1	Proteolysis proteasome: E3	Proteolysis proteasome: E3	NHL (ring finger b-box coiled coil) domain containing
nhr-131	WBGene00003721	T01G6.2	CELE_T01G6.2	T01G6.2a.1, T01G6.2b.1	Transcription factor: NHR	Transcription factor: NHR	Nuclear Hormone Receptor family
nhr-238	WBGene00021611	Y46H3D.7	CELE_Y46H3D.7	Y46H3D.7b, Y46H3D.7a.1	Transcription factor: NHR	Transcription factor: NHR	Nuclear Hormone Receptor family
nhr-65	WBGene00003655	Y17D7A.3	CELE_Y17D7A.3	Y17D7A.3a.1, Y17D7A.3b.1	Transcription factor: NHR	Transcription factor: NHR	Nuclear hormone receptor family member nhr-65
nhr-88	WBGene00003678	K08A2.5	K08A2.a, K08A2.a, CELE_K08A2.5	K08A2.5a.1, K08A2.5a.2, K08A2.5c.1	Transcription factor: NHR	Transcription factor: NHR	Nuclear Hormone Receptor family
numr-2	WBGene00017267	F08F8.1	CELE_F08F8.1	F08F8.1.1	Unknown	Unknown	NUclear localized Metal Responsive
oac-14	WBGene00008602	F09B9.1	CELE_F09B9.1	F09B9.1a.1, F09B9.1b.1	Metabolism: lipid	Metabolism: lipid	O-ACyltransferase homolog
oac-6	WBGene00007833	C31A11.5	CELE_C31A11.5	C31A11.5.1	Metabolism: lipid	Metabolism: lipid	O-ACyltransferase homolog
pals-14	WBGene00009061	F22G12.1	CELE_F22G12.1	F22G12.1.1	Unknown	Unknown	Protein containing ALS2cr12 (ALS2CR12) signature
R03H10.6	WBGene00019858	R03H10.6	CELE_R03H10.6	R03H10.6.1	DNA: replication	DNA: replication	Uncharacterized protein CELE_R03H10.6
R09D1.12	WBGene00011168	R09D1.12	CELE_R09D1.12	R09D1.12.1	Signaling: Y kinase	Signaling: Y kinase	Uncharacterized protein CELE_R09D1.12
R10D12.6	WBGene00011187	R10D12.6	CELE_R10D12.6	R10D12.6.1	Unknown	Unknown	Uncharacterized protein CELE_R10D12.6
siah-1	WBGene00021369	Y37E11AR.2	Y37E11AR.b, Y37E11AR.b, Y37E11AR.d, Y37E11AR.d, CELE_Y37E11AR.2	Y37E11AR.2.1	Proteolysis proteasome: E3	Proteolysis proteasome: E3	E3 ubiquitin-protein ligase siah-1
srh-2	WBGene00005228	C05E4.14	CELE_C05E4.14	C05E4.14a.1, C05E4.14b.1, C05E4.14b.2, C05E4.14b.3, C05E4.14b.4, C05E4.14c.1, C05E4.14d.1, C05E4.14e.1, C05E4.14f.1, C05E4.14g.1, C05E4.14h.1, C05E4.14i.1, C05E4.14j.1	Unknown	Unknown	Serpentine Receptor, class H
srr-6	WBGene00005657	C13D9.1	CELE_C13D9.1	C13D9.1.1	Unknown	Unknown	Serpentine Receptor, class R
srt-39	WBGene00012242	W04D2.2	CELE_W04D2.2	W04D2.2b, W04D2.2a.1, W04D2.2c.1	Transmembrane protein: seven transmembrane receptor	Transmembrane protein: seven transmembrane receptor	Serpentine Receptor, class T
srw-86	WBGene00005833	C25F9.7	CELE_C25F9.7	C25F9.7.1	Transmembrane protein: seven transmembrane receptor	Transmembrane protein: seven transmembrane receptor	Serpentine Receptor, class W
syx-2	WBGene00006372	F48F7.2	syn-2, CELE_F48F7.2	F48F7.2.1	Trafficking: vesicle targeting/fusion	Trafficking: vesicle targeting/fusion	Putative syntaxin-2
T04H1.2	WBGene00011449	T04H1.2	CELE_T04H1.2	T04H1.2.1	Signaling: small GTPase	Signaling: small GTPase	Uncharacterized protein CELE_T04H1.2
T16G1.4	WBGene00011798	T16G1.4	CELE_T16G1.4	T16G1.4.1	Unknown	Unknown	Uncharacterized protein CELE_T16G1.4
T21B4.21	WBGene00220076	T21B4.21	cel-inc169, CELE_T21B4.21	T21B4.21	Non-coding RNA: ncRNA	Non-coding RNA: ncRNA
T22C8.6	WBGene00011927	T22C8.6	CELE_T22C8.6	T22C8.6.1	Unknown	Unknown	Uncharacterized protein CELE_T22C8.6
T24E12.5	WBGene00020774	T24E12.5	CELE_T24E12.5	T24E12.5.1	Unknown	Unknown	Uncharacterized protein CELE_T24E12.5
tbc-14	WBGene00008444	E01G4.1	tbc-15, tbc-15, CELE_E01G4.1	E01G4.1a.1, E01G4.1b.1	Unknown	Unknown	TBC (Tre-2/Bub2/Cdc16) domain family
ugt-2	WBGene00007073	AC3.8	CELE_AC3.8	AC3.8.1	Stress response: detoxification	Stress response: detoxification	UDP-GlucuronosylTransferase
ugt-20	WBGene00019516	K08B4.4	CELE_K08B4.4	K08B4.4.1	Stress response: detoxification	Stress response: detoxification	UDP-GlucuronosylTransferase
ugt-51	WBGene00015369	C03A7.11	CELE_C03A7.11	C03A7.11.1	Stress response: detoxification	Stress response: detoxification	UDP-GlucuronosylTransferase
vem-1	WBGene00006890	K07E3.8	CELE_K07E3.8	K07E3.8.1	Transmembrane transport: other	Transmembrane transport: other	Protein vem-1
W09G12.7	WBGene00021121	W09G12.7	CELE_W09G12.7	W09G12.7.1	Unknown	Unknown	Uncharacterized protein CELE_W09G12.7
Y19D10A.4	WBGene00021219	Y19D10A.4	Y19D10A.d, Y19D10A.d, CELE_Y19D10A.4	Y19D10A.4b, Y19D10A.4a.1, Y19D10A.4c.1, Y19D10A.4d.1	Unknown	Unknown	Uncharacterized protein CELE_Y19D10A.4
Y38C1AA.6	WBGene00021397	Y38C1AA.6	CELE_Y38C1AA.6	Y38C1AA.6.1	Proteolysis general: other	Proteolysis general: other	Uncharacterized protein CELE_Y38C1AA.6
Y43F8C.3	WBGene00012825	Y43F8C.3	CELE_Y43F8C.3	Y43F8C.3.1	Unknown	Unknown	Uncharacterized protein CELE_Y43F8C.3
Y77E11A.2	WBGene00022307	Y77E11A.2	Y77E11A.r, Y77E11A.r, CELE_Y77E11A.2	Y77E11A.2.1			Uncharacterized protein CELE_Y77E11A.2
zip-5	WBGene00007932	C34D1.5	CELE_C34D1.5	C34D1.5a.1, C34D1.5b.1, C34D1.5c.1	Transcription factor: bZIP	Transcription factor: bZIP	bZIP transcription factor family

## Sheet: Supplementary File 3b
Gene Name	WormBase Gene ID	Sequence Name	Other Name	Transcript	WormCat Category 2	WormCat Category 3	NCBI WBcel235 WS277 description
acs-12	WBGene00009106	F25C8.4	CELE_F25C8.4	F25C8.4.1	Metabolism: lipid	Metabolism: lipid	fatty Acid CoA Synthetase family
B0507.6	WBGene00015223	B0507.6	CELE_B0507.6	B0507.6.1	Unknown	Unknown	Uncharacterized protein CELE_B0507.6
bath-36	WBGene00013569	Y75B12B.4	CELE_Y75B12B.4	Y75B12B.4.1	Unknown	Unknown	BTB and MATH domain-containing protein 36
C06G3.6	WBGene00015552	C06G3.6	CELE_C06G3.6	C06G3.6.1, C06G3.6.2	Cytoskeleton: other	Cytoskeleton: other	Uncharacterized protein CELE_C06G3.6
C08B6.2	WBGene00007423	C08B6.2	CELE_C08B6.2	C08B6.2a.1, C08B6.2b.1, C08B6.2c.1, C08B6.2d.1	Unknown	Unknown	Uncharacterized protein CELE_C08B6.2
C10C5.5	WBGene00007509	C10C5.5	CELE_C10C5.5	C10C5.5.1	Metabolism: amino acid	Metabolism: amino acid	Aminoacylase
C14B9.3	WBGene00015753	C14B9.3	CELE_C14B9.3	C14B9.3.1	Unknown	Unknown	Uncharacterized protein CELE_C14B9.3
C15B12.8	WBGene00015788	C15B12.8	SOX, CELE_C15B12.8	C15B12.8.1	Unknown	Unknown	Uncharacterized protein CELE_C15B12.8
C18H9.5	WBGene00016003	C18H9.5	CELE_C18H9.5	C18H9.5.1	Transmembrane transport: solute carrier	Transmembrane transport: solute carrier	Uncharacterized protein CELE_C18H9.5
C25F9.5	WBGene00007725	C25F9.5	CELE_C25F9.5	C25F9.5.1, C25F9.5.2	Unknown	Unknown	Uncharacterized protein CELE_C25F9.5
C31H5.5	WBGene00007856	C31H5.5	CELE_C31H5.5	C31H5.5.1	Unknown	Unknown	Uncharacterized protein CELE_C31H5.5
C32D5.12	WBGene00016319	C32D5.12	phi-45, CELE_C32D5.12	C32D5.12.1	Metabolism: lipid	Metabolism: lipid	Uncharacterized protein CELE_C32D5.12
C32E8.9	WBGene00016325	C32E8.9	CELE_C32E8.9	C32E8.9.1	Metabolism: lipid	Metabolism: lipid	Uncharacterized protein CELE_C32E8.9
C33D9.6	WBGene00007900	C33D9.6	CELE_C33D9.6	C33D9.6a.1, C33D9.6a.2, C33D9.6b.1	Unknown	Unknown	Uncharacterized protein CELE_C33D9.6
C34D1.4	WBGene00007931	C34D1.4	CELE_C34D1.4	C34D1.4a.1, C34D1.4b.1, C34D1.4c.1	Unknown	Unknown	Uncharacterized protein CELE_C34D1.4
C34D10.2	WBGene00016407	C34D10.2	CELE_C34D10.2	C34D10.2a.1, C34D10.2a.2, C34D10.2a.3, C34D10.2b.1			Uncharacterized protein CELE_C34D10.2
C37C3.10	WBGene00016502	C37C3.10	CELE_C37C3.10	C37C3.10.1	Unknown	Unknown	Uncharacterized protein CELE_C37C3.10
C44C1.6	WBGene00016645	C44C1.6	CELE_C44C1.6	C44C1.6.1	Unknown	Unknown	Uncharacterized protein CELE_C44C1.6
C44E12.1	WBGene00016657	C44E12.1	CELE_C44E12.1	C44E12.1.1	Metabolism: other	Metabolism: other	Uncharacterized protein CELE_C44E12.1
C49C3.15	WBGene00008204	C49C3.15	CELE_C49C3.15	C49C3.15.1	Unknown	Unknown	Uncharacterized protein CELE_C49C3.15
C52E2.5	WBGene00016884	C52E2.5	C52E2.c, C52E2.c, C52E2.e, C52E2.e, CELE_C52E2.5	C52E2.5.1	Unknown	Unknown	Uncharacterized protein CELE_C52E2.5
C56E6.2	WBGene00016970	C56E6.2	C56E6.f, C56E6.f, CELE_C56E6.2	C56E6.2.1	Signaling: small GTPase	Signaling: small GTPase	Uncharacterized protein CELE_C56E6.2
cbp-2	WBGene00010545	K03H1.10	CELE_K03H1.10	K03H1.10.1, K03H1.10.2	Transcription: chromatin modification	Transcription: chromatin modification	CBP/p300 homolog
ceeh-1	WBGene00019329	K02F3.6	CELE_K02F3.6	K02F3.6.1, K02F3.6.2	Metabolism: lipid	Metabolism: lipid	Epoxide hydrolase 1
chil-13	WBGene00010945	M176.8	CELE_M176.8	M176.8.1	Extracellular material: chitinase	Extracellular material: chitinase	CHItinase-Like
clec-144	WBGene00012086	T27D12.3	CELE_T27D12.3	T27D12.3.1	Stress response: C-type Lectin	Stress response: C-type Lectin	C-type LECtin
clec-222	WBGene00007283	C03E10.6	CELE_C03E10.6	C03E10.6.1	Stress response: C-type Lectin	Stress response: C-type Lectin	C-type LECtin
clec-223	WBGene00007282	C03E10.5	CELE_C03E10.5	C03E10.5.1	Stress response: C-type Lectin	Stress response: C-type Lectin	C-type LECtin
comt-4	WBGene00021491	Y40B10A.6	Y40B10A.e, Y40B10A.e, CELE_Y40B10A.6	Y40B10A.6.1	Protein modification: methyltransferase	Protein modification: methyltransferase	Catechol-O-MethylTransferase family
cyp-13A3	WBGene00011675	T10B9.5	CELE_T10B9.5	T10B9.5.1	Stress response: detoxification	Stress response: detoxification	Putative cytochrome P450 CYP13A3
cyp-14A2	WBGene00010706	K09A11.3	tag-190, CELE_K09A11.3	K09A11.3.1	Stress response: detoxification	Stress response: detoxification	CYtochrome P450 family
D1054.18	WBGene00077783	D1054.18	CELE_D1054.18	D1054.18a.1, D1054.18b.1	Unknown	Unknown	Uncharacterized protein CELE_D1054.18
ddo-1	WBGene00008127	C47A10.5	CELE_C47A10.5	C47A10.5a.1, C47A10.5b.1	Metabolism: amino acid	Metabolism: amino acid	D-aspartate oxidase 1
del-5	WBGene00010334	F59F3.4	CELE_F59F3.4	F59F3.4.1	Transmembrane transport: sodium channel	Transmembrane transport: sodium channel	DEgenerin Like
DH11.2	WBGene00008436	DH11.2	CELE_DH11.2	DH11.2.1	Unknown	Unknown	Uncharacterized protein CELE_DH11.2
E02C12.10	WBGene00017095	E02C12.10	CELE_E02C12.10	E02C12.10.1	Unknown	Unknown	Uncharacterized protein CELE_E02C12.10
ech-9	WBGene00001158	F01G10.3	CELE_F01G10.3	F01G10.3a.1, F01G10.3b.1	Metabolism: lipid	Metabolism: lipid	Enoyl-CoA Hydratase
efk-1	WBGene00001160	F42A10.4	efk1, efk1, CELE_F42A10.4	F42A10.4a.1, F42A10.4b.1	Signaling: calcium	Signaling: calcium	Eukaryotic elongation factor 2 kinase
egl-9	WBGene00001178	F22E12.4	CELE_F22E12.4	F22E12.4a.1, F22E12.4b.1, F22E12.4b.2, F22E12.4b.3, F22E12.4c.1, F22E12.4d.1, F22E12.4e.1	Protein modification: other	Protein modification: other	Hypoxia-inducible factor prolyl hydroxylase
ethe-1	WBGene00007886	C33A12.7	CELE_C33A12.7	C33A12.7.1	Metabolism: glutathione	Metabolism: glutathione	ETHE1 (human ETHylmalonic Encephalopathy) homolog
F07C3.9	WBGene00017197	F07C3.9	CELE_F07C3.9	F07C3.9.1	Unknown	Unknown	Uncharacterized protein CELE_F07C3.9
F13H8.11	WBGene00017443	F13H8.11	CELE_F13H8.11	F13H8.11.1	Signaling: lipid	Signaling: lipid	Uncharacterized protein CELE_F13H8.11
F16H6.10	WBGene00008900	F16H6.10	CELE_F16H6.10	F16H6.10.1	Stress response: pathogen	Stress response: pathogen	Uncharacterized protein CELE_F16H6.10
F17C11.11	WBGene00008922	F17C11.11	CELE_F17C11.11	F17C11.11a.1, F17C11.11b.1	Stress response: other	Stress response: other	Uncharacterized protein CELE_F17C11.11
F22B3.7	WBGene00009038	F22B3.7	CELE_F22B3.7	F22B3.7.1	Unknown	Unknown	Uncharacterized protein CELE_F22B3.7
F22B5.4	WBGene00009042	F22B5.4	CELE_F22B5.4	F22B5.4.1, F22B5.4.2	Unknown	Unknown	Uncharacterized protein CELE_F22B5.4
F25E5.4	WBGene00017785	F25E5.4	CELE_F25E5.4	F25E5.4.1	Unknown	Unknown	Uncharacterized protein CELE_F25E5.4
F29C6.1	WBGene00009243	F29C6.1	CELE_F29C6.1	F29C6.1a.1, F29C6.1b.1	Unknown	Unknown	Uncharacterized protein CELE_F29C6.1
F35E12.9	WBGene00009433	F35E12.9	CELE_F35E12.9	F35E12.9d, F35E12.9a.1, F35E12.9b.1, F35E12.9c.1	Unknown	Unknown	Uncharacterized protein CELE_F35E12.9
F37H8.2	WBGene00009511	F37H8.2	CELE_F37H8.2	N.A.	Unknown	Unknown	Uncharacterized protein CELE_F37H8.2
F42C5.4	WBGene00018346	F42C5.4	CELE_F42C5.4	F42C5.4a.1, F42C5.4b.1	Proteolysis proteasome: E3	Proteolysis proteasome: E3	Uncharacterized protein CELE_F42C5.4
F42G2.2	WBGene00018351	F42G2.2	CELE_F42G2.2	F42G2.2a.1, F42G2.2b.1, F42G2.2b.2, F42G2.2c.1	Unknown	Unknown	Uncharacterized protein CELE_F42G2.2
F45D11.14	WBGene00018459	F45D11.14	CELE_F45D11.14	F45D11.14.1	Unknown	Unknown	Uncharacterized protein CELE_F45D11.14
F47H4.2	WBGene00009835	F47H4.2	CELE_F47H4.2	F47H4.2a.1, F47H4.2b.1	Proteolysis proteasome: E3	Proteolysis proteasome: E3	Uncharacterized protein CELE_F47H4.2
F53C3.4	WBGene00018748	F53C3.4	CELE_F53C3.4	F53C3.4.1	Unknown	Unknown	Uncharacterized protein CELE_F53C3.4
F56D2.5	WBGene00018966	F56D2.5	CELE_F56D2.5	F56D2.5.1	Proteolysis proteasome: E3	Proteolysis proteasome: E3	RBR-type E3 ubiquitin transferase
F57B9.1	WBGene00018996	F57B9.1	CELE_F57B9.1	F57B9.1.1, F57B9.1.2	Metabolism: B6	Metabolism: B6	Putative pyridoxamine 5\'-phosphate oxidase
fbxa-188	WBGene00009839	F47H4.8	CELE_F47H4.8	F47H4.8.1	Proteolysis proteasome: E3	Proteolysis proteasome: E3	F-box A protein
fbxa-25	WBGene00022321	Y82E9BL.4	CELE_Y82E9BL.4	Y82E9BL.4.1	Proteolysis proteasome: E3	Proteolysis proteasome: E3	F-box A protein
fbxa-26	WBGene00022324	Y82E9BL.7	CELE_Y82E9BL.7	Y82E9BL.7.1	Proteolysis proteasome: E3	Proteolysis proteasome: E3	F-box A protein
fbxa-50	WBGene00013844	ZC47.13	CELE_ZC47.13	ZC47.13b, ZC47.13a.1	Proteolysis proteasome: E3	Proteolysis proteasome: E3	F-box A protein
fmo-4	WBGene00001479	F53F4.5	fmo-14, CELE_F53F4.5	F53F4.5b, F53F4.5a.1	Metabolism: FMO	Metabolism: FMO	Dimethylaniline monooxygenase
frm-10	WBGene00001496	F25H9.5	CELE_F25H9.5	F25H9.5a.1, F25H9.5b.1	Signaling: FERM	Signaling: FERM	FERM domain (protein4.1-ezrin-radixin-moesin) family
gbh-2	WBGene00001523	M05D6.7	CELE_M05D6.7	M05D6.7.1	Metabolism: glutathione	Metabolism: glutathione	Gamma Butyrobetaine Hydroxylase
gcl-1	WBGene00013382	Y62E10A.16	CELE_Y62E10A.16	Y62E10A.16.1	Development: germline	Development: germline	GCL (Drosophila Germ Cell-Less) homolog
glb-1	WBGene00014030	ZK637.13	CELE_ZK637.13	ZK637.13.1	Globin	Globin	Globin-like protein
glb-15	WBGene00009387	F35B12.8	CELE_F35B12.8	F35B12.8.1	Globin	Globin	GLoBin related
hgo-1	WBGene00001843	W06D4.1	HGO, HGO, CELE_W06D4.1	W06D4.1.1	Metabolism: amino acid	Metabolism: amino acid	Homogentisate 1,2-dioxygenase
K04C1.3	WBGene00010553	K04C1.3	CELE_K04C1.3	K04C1.3.1	Transcription factor: ZF	Transcription factor: ZF	Uncharacterized protein CELE_K04C1.3
K05C4.9	WBGene00010585	K05C4.9	CELE_K05C4.9	K05C4.9a.1, K05C4.9b.1	Cell cycle: other	Cell cycle: other	Uncharacterized protein CELE_K05C4.9
K08B4.7	WBGene00023486	K08B4.7	CELE_K08B4.7	K08B4.7.1	Proteolysis general: inhibitor	Proteolysis general: inhibitor	Cystatin
K11D12.13	WBGene00044535	K11D12.13	CELE_K11D12.13	K11D12.13.1	Proteolysis general: inhibitor	Proteolysis general: inhibitor	Uncharacterized protein CELE_K11D12.13
K11G9.1	WBGene00019652	K11G9.1	CELE_K11G9.1	K11G9.1.1			Carboxylic ester hydrolase
kmo-1	WBGene00011089	R07B7.5	CELE_R07B7.5	R07B7.5.1	Metabolism: amino acid	Metabolism: amino acid	Kynurenine 3-monooxygenase
linc-72	WBGene00219590	F46C5.14	CELE_F46C5.14	F46C5.14, F46C5.14:wp275	Non-coding RNA: linc	Non-coding RNA: linc
M01H9.2	WBGene00019718	M01H9.2	CELE_M01H9.2	M01H9.2.1	Unknown	Unknown	Uncharacterized protein CELE_M01H9.2
M03A1.3	WBGene00019746	M03A1.3	CELE_M03A1.3	M03A1.3.1	Stress response: other	Stress response: other	Uncharacterized protein CELE_M03A1.3
madf-10	WBGene00013717	Y106G6H.4	CELE_Y106G6H.4	Y106G6H.4.1	Unknown	Unknown	MADF domain transcription factor
math-27	WBGene00018101	F36H5.2	CELE_F36H5.2	N.A.	Development: apoptosis	Development: apoptosis	MATH (meprin-associated Traf homology) domain containing
mce-1	WBGene00008415	D2030.5	CELE_D2030.5	D2030.5.1	Metabolism: lipid	Metabolism: lipid	Methylmalonyl-CoA Epimerase
mmaa-1	WBGene00020169	T02G5.13	CELE_T02G5.13	T02G5.13a.1, T02G5.13b.1, T02G5.13b.2	Metabolism: 1CC	Metabolism: 1CC	Methylmalonic aciduria type A homolog, mitochondrial
nas-28	WBGene00003546	F42A10.8	CELE_F42A10.8	F42A10.8.1	Proteolysis general: metallopeptidase	Proteolysis general: metallopeptidase	Zinc metalloproteinase nas-28
nhr-161	WBGene00016364	C33G8.7	CELE_C33G8.7	C33G8.7.1, C33G8.7.2	Transcription factor: NHR	Transcription factor: NHR	Nuclear Hormone Receptor family
nhr-173	WBGene00016975	C56E10.1	CELE_C56E10.1	C56E10.1.1	Transcription factor: NHR	Transcription factor: NHR	Nuclear Hormone Receptor family
nhr-195	WBGene00019115	F59E11.10	CELE_F59E11.10	F59E11.10a.1, F59E11.10a.2, F59E11.10a.3, F59E11.10a.4, F59E11.10a.5, F59E11.10a.6, F59E11.10b.1	Transcription factor: NHR	Transcription factor: NHR	Nuclear Hormone Receptor family
nhr-210	WBGene00020015	R11G11.12	CELE_R11G11.12	R11G11.12a.1	Transcription factor: NHR	Transcription factor: NHR	Nuclear Hormone Receptor family
nhr-42	WBGene00003632	C33G8.6	CELE_C33G8.6	C33G8.6.1	Transcription factor: NHR	Transcription factor: NHR	Nuclear hormone receptor family member nhr-42
nhr-59	WBGene00003649	T27B7.1	CELE_T27B7.1	T27B7.1a.1, T27B7.1b.1	Transcription factor: NHR	Transcription factor: NHR	Nuclear hormone receptor family member nhr-59
nlg-1	WBGene00006412	C40C9.5	tag-27, cest-14, CELE_C40C9.5	C40C9.5a.1, C40C9.5b.1, C40C9.5c.1, C40C9.5d.1, C40C9.5e.1, C40C9.5f.1, C40C9.5g.1, C40C9.5h.1, C40C9.5i.1	Neuronal function: synaptic function	Neuronal function: synaptic function	Neuroligin-1
oac-31	WBGene00018707	F52F10.3	CELE_F52F10.3	F52F10.3.1	Metabolism: lipid	Metabolism: lipid	O-ACyltransferase homolog
oac-54	WBGene00012323	W07A12.6	CELE_W07A12.6	W07A12.6.1	Metabolism: lipid	Metabolism: lipid	O-ACyltransferase homolog
oac-7	WBGene00007835	C31A11.7	CELE_C31A11.7	C31A11.7.1	Metabolism: lipid	Metabolism: lipid	O-ACyltransferase homolog
pck-1	WBGene00021043	W05G11.6	CELE_W05G11.6	W05G11.6.1	Metabolism: glycolysis	Metabolism: glycolysis	Phosphoenolypyruvate CarboxyKinase
pcp-2	WBGene00003957	F23B2.12	CELE_F23B2.12	F23B2.12.1	Proteolysis general: carboxypeptidase	Proteolysis general: carboxypeptidase	Prolyl Carboxy Peptidase like
pgp-7	WBGene00004001	T21E8.2	CELE_T21E8.2	T21E8.2.1	Transmembrane transport: ABC	Transmembrane transport: ABC	P-GlycoProtein related
phy-2	WBGene00004025	F35G2.4	CELE_F35G2.4	F35G2.4.1	Extracellular material: PGI	Extracellular material: PGI	Prolyl 4-hydroxylase subunit alpha-2
R05G6.10	WBGene00019902	R05G6.10	CELE_R05G6.10	R05G6.10a.1, R05G6.10b.1, R05G6.10c.1, R05G6.10d.1, R05G6.10e.1	Signaling: small GTPase	Signaling: small GTPase	Uncharacterized protein CELE_R05G6.10
R07E4.1	WBGene00019935	R07E4.1	CELE_R07E4.1	R07E4.1a.1, R07E4.1b.1, R07E4.1b.2	Unknown	Unknown	Uncharacterized protein CELE_R07E4.1
R08D7.7	WBGene00011147	R08D7.7	CELE_R08D7.7	R08D7.7.1, R08D7.7.2	Metabolism: carbohydrate	Metabolism: carbohydrate	Uncharacterized sugar kinase R08D7.7
skr-5	WBGene00004811	F47H4.10	CELE_F47H4.10	F47H4.10.1	Proteolysis proteasome: E3	Proteolysis proteasome: E3	SKp1 Related (ubiquitin ligase complex component)
sqrd-1	WBGene00008538	F02H6.5	CELE_F02H6.5	F02H6.5a.1, F02H6.5b.1, F02H6.5c.1, F02H6.5d.1, F02H6.5e.1, F02H6.5f.1	Stress response: other	Stress response: other	Sulfide Quinone oxidoReDuctase
srd-35	WBGene00005113	R186.2	CELE_R186.2	R186.2a.1, R186.2b.1	Transmembrane protein: seven transmembrane receptor	Transmembrane protein: seven transmembrane receptor	Serpentine Receptor, class D (delta)
srh-283	WBGene00005488	C47A10.2	CELE_C47A10.2	C47A10.2.1	Transmembrane protein: seven transmembrane receptor	Transmembrane protein: seven transmembrane receptor	Serpentine Receptor, class H
srx-12	WBGene00005903	Y55F3AM.2	CELE_Y55F3AM.2	Y55F3AM.2.1	Transmembrane protein: seven transmembrane receptor	Transmembrane protein: seven transmembrane receptor	Serpentine Receptor, class X
srx-125	WBGene00006016	F32H5.6	CELE_F32H5.6	F32H5.6a.1, F32H5.6b.1, F32H5.6c.1	Transmembrane protein: seven transmembrane receptor	Transmembrane protein: seven transmembrane receptor	Serpentine Receptor, class X
srx-21	WBGene00005912	F31F4.4	CELE_F31F4.4	F31F4.4.1	Transmembrane protein: seven transmembrane receptor	Transmembrane protein: seven transmembrane receptor	Serpentine Receptor, class X
T04A11.1	WBGene00011416	T04A11.1	CELE_T04A11.1	T04A11.1.1	Metabolism: other	Metabolism: other	Uncharacterized protein CELE_T04A11.1
T07G12.5	WBGene00011596	T07G12.5	CELE_T07G12.5	T07G12.5a.1, T07G12.5b.1, T07G12.5c.1	Transmembrane transport: solute carrier	Transmembrane transport: solute carrier	Uncharacterized protein CELE_T07G12.5
T20D4.3	WBGene00020609	T20D4.3	CELE_T20D4.3	T20D4.3a.1, T20D4.3b.1	Unknown	Unknown	Uncharacterized protein CELE_T20D4.3
T24A6.7	WBGene00020747	T24A6.7	CELE_T24A6.7	T24A6.7.1	Unknown	Unknown	Uncharacterized protein CELE_T24A6.7
T28F3.5	WBGene00012131	T28F3.5	CELE_T28F3.5	T28F3.5a.1, T28F3.5b.1	Metabolism: lipid	Metabolism: lipid	Uncharacterized protein CELE_T28F3.5
T28H10.1	WBGene00012142	T28H10.1	CELE_T28H10.1	T28H10.1a.1, T28H10.1b.1	Metabolism: other	Metabolism: other	Uncharacterized protein CELE_T28H10.1
T28H10.3	WBGene00012144	T28H10.3	CELE_T28H10.3	T28H10.3.1	Proteolysis general: aspartate	Proteolysis general: aspartate	Uncharacterized protein CELE_T28H10.3
tbc-6	WBGene00015410	C04A2.1	CELE_C04A2.1	C04A2.1.1, C04A2.1.2	Unknown	Unknown	Growth hormone-regulated TBC protein 6
tpra-1	WBGene00008366	D1046.5	CELE_D1046.5	D1046.5a.1, D1046.5b.1	Transmembrane protein: other	Transmembrane protein: other	Transmembrane protein adipocyte-associated 1 homolog
tps-2	WBGene00006603	F19H8.1	CELE_F19H8.1	F19H8.1a.1, F19H8.1b.1	Metabolism: carbohydrate	Metabolism: carbohydrate	Alpha,alpha-trehalose-phosphate synthase
twk-31	WBGene00006683	Y47D3B.5	CELE_Y47D3B.5	Y47D3B.5a.1, Y47D3B.5b.1	Transmembrane transport: potassium channel	Transmembrane transport: potassium channel	TWiK family of potassium channels
ugt-17	WBGene00007422	C08B6.1	CELE_C08B6.1	C08B6.1a.1, C08B6.1b.1	Stress response: detoxification	Stress response: detoxification	UDP-GlucuronosylTransferase
ugt-24	WBGene00016762	C49A9.8	CELE_C49A9.8	C49A9.8.1, C49A9.8.2	Stress response: detoxification	Stress response: detoxification	UDP-glucuronosyltransferase
ugt-4	WBGene00013905	ZC455.5	CELE_ZC455.5	ZC455.5b, ZC455.5a.1	Stress response: detoxification	Stress response: detoxification	UDP-glucuronosyltransferase
ugt-5	WBGene00013906	ZC455.6	CELE_ZC455.6	ZC455.6a.1, ZC455.6b.1, ZC455.6b.2, ZC455.6b.3	Stress response: detoxification	Stress response: detoxification	UDP-GlucuronosylTransferase; UDP-glucuronosyltransferase
ugt-50	WBGene00011564	T07C5.1	CELE_T07C5.1	T07C5.1b.1, T07C5.1b.2, T07C5.1c.1, T07C5.1d.1, T07C5.1e.1	Stress response: detoxification	Stress response: detoxification	Putative UDP-glucuronosyltransferase ugt-50; UDP-GlucuronosylTransferase; UDP-glucuronosyltransferase
W07A12.4	WBGene00012322	W07A12.4	CELE_W07A12.4	W07A12.4a.1, W07A12.4b.1, W07A12.4c.1, W07A12.4d.1	Unknown	Unknown	Uncharacterized protein CELE_W07A12.4
Y102A11A.9	WBGene00022419	Y102A11A.9	CELE_Y102A11A.9	Y102A11A.9c, Y102A11A.9d, Y102A11A.9a.1, Y102A11A.9b.1	Unknown	Unknown	Uncharacterized protein CELE_Y102A11A.9
Y105C5B.25	WBGene00013662	Y105C5B.25	CELE_Y105C5B.25	Y105C5B.25a.1, Y105C5B.25b.1	Unknown	Unknown	Uncharacterized protein CELE_Y105C5B.25
Y116A8C.25	WBGene00013802	Y116A8C.25	CELE_Y116A8C.25	Y116A8C.25a.1, Y116A8C.25b.1, Y116A8C.25c.1, Y116A8C.25d.1, Y116A8C.25e.1, Y116A8C.25f.1	Metabolism: carbohydrate	Metabolism: carbohydrate	Uncharacterized protein CELE_Y116A8C.25
Y17G7B.8	WBGene00012462	Y17G7B.8	CELE_Y17G7B.8	Y17G7B.8.1	Stress response: pathogen	Stress response: pathogen	Uncharacterized protein CELE_Y17G7B.8
Y32B12C.1	WBGene00012525	Y32B12C.1	CELE_Y32B12C.1	Y32B12C.1.1	Unknown	Unknown	Uncharacterized protein CELE_Y32B12C.1
Y40H7A.11	WBGene00012748	Y40H7A.11	CELE_Y40H7A.11	Y40H7A.11.1	Unknown	Unknown	Uncharacterized protein CELE_Y40H7A.11
Y43F8B.13	WBGene00012823	Y43F8B.13	CELE_Y43F8B.13	Y43F8B.13.1	Unknown	Unknown	Uncharacterized protein CELE_Y43F8B.13
Y43F8B.15	WBGene00045415	Y43F8B.15	CELE_Y43F8B.15	Y43F8B.15.1	Unknown	Unknown	Uncharacterized protein CELE_Y43F8B.15
Y43F8B.23	WBGene00194815	Y43F8B.23	CELE_Y43F8B.23	Y43F8B.23.1	Unknown	Unknown	Uncharacterized protein CELE_Y43F8B.23
Y47H10A.5	WBGene00012961	Y47H10A.5	CELE_Y47H10A.5	Y47H10A.5.1	Unknown	Unknown	Uncharacterized protein CELE_Y47H10A.5
Y4C6B.4	WBGene00021158	Y4C6B.4	Y4C6B.e, Y4C6B.e, CELE_Y4C6B.4	Y4C6B.4a.1, Y4C6B.4b.1, Y4C6B.4b.2	Transmembrane transport: solute carrier	Transmembrane transport: solute carrier	Uncharacterized protein CELE_Y4C6B.4
Y53G8B.2	WBGene00021818	Y53G8B.2	CELE_Y53G8B.2	Y53G8B.2.1	Metabolism: lipid	Metabolism: lipid	Uncharacterized protein CELE_Y53G8B.2
Y57A10A.14	WBGene00013257	Y57A10A.14	CELE_Y57A10A.14	Y57A10A.14a.1, Y57A10A.14b.1	Unknown	Unknown	Uncharacterized protein CELE_Y57A10A.14
Y5H2B.1	WBGene00021164	Y5H2B.1	Y5H2B.i, Y5H2B.i, CELE_Y5H2B.1	Y5H2B.1a.1, Y5H2B.1b.1			Uncharacterized protein CELE_Y5H2B.1
ZK228.4	WBGene00013947	ZK228.4	CELE_ZK228.4	ZK228.4a.1, ZK228.4b.1, ZK228.4c.1	Stress response: pathogen	Stress response: pathogen	Uncharacterized protein CELE_ZK228.4
ZK550.6	WBGene00014000	ZK550.6	yk151d7.3, CELE_ZK550.6	ZK550.6.1	Metabolism: other	Metabolism: other	Probable phytanoyl-CoA dioxygenase

## Sheet: Supplementary File 3c
Gene Name	WormBase Gene ID	Sequence Name	Other Name	Transcript	WormCat Category 2	WormCat Category 3	NCBI WBcel235 WS277 description
aakg-4	WBGene00020135	T01B6.3	CELE_T01B6.3	T01B6.3a.1, T01B6.3b.1	Signaling: AMPK	Signaling: AMPK	AMP-Activated protein Kinase Gamma subunit
arrd-11	WBGene00011052	R06B9.1	CELE_R06B9.1	R06B9.1.1	Signaling: heteromeric G protein	Signaling: heteromeric G protein	ARRestin Domain protein
arrd-24	WBGene00009852	F48F7.7	CELE_F48F7.7	F48F7.7.1	Signaling: heteromeric G protein	Signaling: heteromeric G protein	ARRestin Domain protein
arrd-8	WBGene00012467	Y17G7B.14	CELE_Y17G7B.14	Y17G7B.14.1	Signaling: heteromeric G protein	Signaling: heteromeric G protein	ARRestin Domain protein
B0205.13	WBGene00044644	B0205.13	CELE_B0205.13	B0205.13.1	Unknown	Unknown	Uncharacterized protein CELE_B0205.13
B0205.14	WBGene00044646	B0205.14	CELE_B0205.14	B0205.14.1, B0205.14.2, B0205.14.3	Unknown	Unknown	Uncharacterized protein CELE_B0205.14
B0310.3	WBGene00015139	B0310.3	CELE_B0310.3	B0310.3.1, B0310.3.2, B0310.3.3	Unknown	Unknown	Uncharacterized protein CELE_B0310.3
B0462.5	WBGene00194695	B0462.5	CELE_B0462.5	B0462.5.1	Unknown	Unknown	Uncharacterized protein CELE_B0462.5
best-5	WBGene00007404	C07A9.8	CELE_C07A9.8	C07A9.8.1	Transmembrane transport: chloride channel	Transmembrane transport: chloride channel	Bestrophin homolog 5
bigr-1	WBGene00009512	F37H8.3	CELE_F37H8.3	F37H8.3a.1, F37H8.3b.1	Metabolism: lipid	Metabolism: lipid	Uncharacterized protein CELE_F37H8.3
C02F5.12	WBGene00015352	C02F5.12	CELE_C02F5.12	C02F5.12.1	Nucleic acid: binding	Nucleic acid: binding	Putative zinc finger protein C02F5.12
C04A11.5	WBGene00007288	C04A11.5	CELE_C04A11.5	C04A11.5.1, C04A11.5.2	Unknown	Unknown	Uncharacterized protein CELE_C04A11.5
C04C11.25	WBGene00284855	C04C11.25	CELE_C04C11.25	C04C11.25.1	Unknown	Unknown	Uncharacterized protein CELE_C04C11.25
C06B3.6	WBGene00007365	C06B3.6	CELE_C06B3.6	C06B3.6.1	Metabolism: lipid	Metabolism: lipid	Uncharacterized protein CELE_C06B3.6
C06B3.7	WBGene00007366	C06B3.7	CELE_C06B3.7	C06B3.7.1	Unknown	Unknown	Uncharacterized protein CELE_C06B3.7
C06E1.11	WBGene00015526	C06E1.11	CELE_C06E1.11	C06E1.11.1, C06E1.11.2	Unknown	Unknown	Uncharacterized protein CELE_C06E1.11
C08E8.4	WBGene00007440	C08E8.4	CELE_C08E8.4	C08E8.4.1	Metabolism: short chain dehydrogenase	Metabolism: short chain dehydrogenase	Uncharacterized protein CELE_C08E8.4
C08F11.13	WBGene00007460	C08F11.13	CELE_C08F11.13	C08F11.13a.1, C08F11.13b.1, C08F11.13c.1, C08F11.13c.2	Unknown	Unknown	Uncharacterized protein CELE_C08F11.13
C10C5.2	WBGene00007506	C10C5.2	CELE_C10C5.2	C10C5.2.1			Uncharacterized protein CELE_C10C5.2
C11G10.1	WBGene00007525	C11G10.1	CELE_C11G10.1	C11G10.1.1	Unknown	Unknown	Uncharacterized protein CELE_C11G10.1
C18A11.1	WBGene00015947	C18A11.1	CELE_C18A11.1	C18A11.1.1	Unknown	Unknown	Uncharacterized protein CELE_C18A11.1
C23H4.2	WBGene00007691	C23H4.2	CELE_C23H4.2	C23H4.2.1			Carboxylic ester hydrolase
C23H4.6	WBGene00007694	C23H4.6	CELE_C23H4.6	C23H4.6a.1, C23H4.6b.1	Cell cycle: chromosome dynamics	Cell cycle: chromosome dynamics	Structural maintenance of chromosomes protein 6
C24B5.4	WBGene00016046	C24B5.4	CELE_C24B5.4	C24B5.4.1	Unknown	Unknown	Uncharacterized protein CELE_C24B5.4
C25F9.12	WBGene00045412	C25F9.12	CELE_C25F9.12	C25F9.12.1	Unknown	Unknown	Uncharacterized protein CELE_C25F9.12
C28G1.6	WBGene00016191	C28G1.6	CELE_C28G1.6	C28G1.6.1	Extracellular material: matrix	Extracellular material: matrix	Uncharacterized protein CELE_C28G1.6
C29F7.2	WBGene00007811	C29F7.2	CELE_C29F7.2	C29F7.2a.1, C29F7.2b.1	Unknown	Unknown	Uncharacterized protein CELE_C29F7.2
C31H2.4	WBGene00016294	C31H2.4	CELE_C31H2.4	C31H2.4.1	Metabolism: amino acid	Metabolism: amino acid	Putative protein C31H2.4
C33D9.13	WBGene00194651	C33D9.13	CELE_C33D9.13	C33D9.13.1, C33D9.13.2	Unknown	Unknown	Uncharacterized protein CELE_C33D9.13
C35A5.6	WBGene00007950	C35A5.6	CELE_C35A5.6	C35A5.6a.1, C35A5.6b.1			Uncharacterized protein CELE_C35A5.6
C36B1.6	WBGene00007973	C36B1.6	CELE_C36B1.6	C36B1.6a.1, C36B1.6b.1	Unknown	Unknown	Uncharacterized protein CELE_C36B1.6
C37A5.3	WBGene00014698	C37A5.3	CELE_C37A5.3	C37A5.3.1, C37A5.3.2	Unknown	Unknown	Uncharacterized protein CELE_C37A5.3
C44H9.5	WBGene00008100	C44H9.5	CELE_C44H9.5	C44H9.5a.1, C44H9.5b.1	Unknown	Unknown	Uncharacterized protein CELE_C44H9.5
C46C2.2	WBGene00008110	C46C2.2	CELE_C46C2.2	C46C2.2.1	Transmembrane transport: solute carrier	Transmembrane transport: solute carrier	Uncharacterized protein CELE_C46C2.2
C49G7.10	WBGene00016788	C49G7.10	CELE_C49G7.10	C49G7.10a.1, C49G7.10b.1	Unknown	Unknown	Uncharacterized protein CELE_C49G7.10
C54F6.18	WBGene00235093	C54F6.18	CELE_C54F6.18	C54F6.18.1, C54F6.18.2	Unknown	Unknown	Uncharacterized protein CELE_C54F6.18
C54G10.1	WBGene00008319	C54G10.1	CELE_C54G10.1	C54G10.1.1	Unknown	Unknown	Uncharacterized protein CELE_C54G10.1
cah-4	WBGene00000282	R01E6.3	CELE_R01E6.3	R01E6.3a.1, R01E6.3b.1	Metabolism: carbonic anhydrase	Metabolism: carbonic anhydrase	Carbonic AnHydrase
catp-3	WBGene00015660	C09H5.2	CELE_C09H5.2	C09H5.2b, C09H5.2a.1	Transmembrane transport: other	Transmembrane transport: other	Cation transporting ATPase
cdr-2	WBGene00008296	C54D10.1	CELE_C54D10.1	C54D10.1.1	Stress response: heavy metal	Stress response: heavy metal	CaDmium Responsive
chil-18	WBGene00011161	R09D1.5	CELE_R09D1.5	R09D1.5.1	Extracellular material: chitinase	Extracellular material: chitinase	CHItinase-Like
ckr-2	WBGene00021439	Y39A3B.5	CELE_Y39A3B.5	Y39A3B.5a.1, Y39A3B.5b.1, Y39A3B.5d.1, Y39A3B.5e.1, Y39A3B.5f.1	Transmembrane protein: other	Transmembrane protein: other	CholecystoKinin Receptor homolog
cnc-2	WBGene00000556	R09B5.3	CELE_R09B5.3	R09B5.3a.1, R09B5.3a.2, R09B5.3b.1	Stress response: pathogen	Stress response: pathogen	CaeNaCin (Caenorhabditis bacteriocin)
cnc-4	WBGene00000558	R09B5.9	CELE_R09B5.9	R09B5.9.1	Stress response: pathogen	Stress response: pathogen	CaeNaCin (Caenorhabditis bacteriocin)
cng-1	WBGene00000562	F14H8.6	CELE_F14H8.6	F14H8.6a, F14H8.6c, F14H8.6b.1, F14H8.6b.2	Transmembrane transport: nucleotide gated channel	Transmembrane transport: nucleotide gated channel	Cyclic Nucleotide Gated channel
coel-1	WBGene00016866	C52B9.3	CELE_C52B9.3	C52B9.3a.1, C52B9.3b.1	Cytoskeleton: microtubule	Cytoskeleton: microtubule	tubulin folding COfactor E-Like protein
comt-5	WBGene00021492	Y40B10A.7	Y40B10A.c, Y40B10A.c, CELE_Y40B10A.7	Y40B10A.7.1	Protein modification: methyltransferase	Protein modification: methyltransferase	Catechol-O-MethylTransferase family
cyp-13A8	WBGene00011674	T10B9.4	CELE_T10B9.4	T10B9.4.1	Stress response: detoxification	Stress response: detoxification	Putative cytochrome P450 CYP13A8
cyp-14A1	WBGene00010705	K09A11.2	CELE_K09A11.2	K09A11.2.1	Stress response: detoxification	Stress response: detoxification	CYtochrome P450 family
cyp-14A4	WBGene00011009	R04D3.1	CELE_R04D3.1	R04D3.1.1	Stress response: detoxification	Stress response: detoxification	CYtochrome P450 family
cyp-14A5	WBGene00000373	F08F3.7	ccp-14A5, CELE_F08F3.7	F08F3.7.1	Stress response: pathogen	Stress response: pathogen	CYtochrome P450 family
cyp-32B1	WBGene00021167	Y5H2B.5	Y5H2B.c, Y5H2B.c, CELE_Y5H2B.5	Y5H2B.5.1	Stress response: detoxification	Stress response: detoxification	CYtochrome P450 family
cyp-33C7	WBGene00018260	F41B5.2	CELE_F41B5.2	F41B5.2.1	Stress response: heavy metal	Stress response: heavy metal	CYtochrome P450 family
cyp-33C8	WBGene00019967	R08F11.3	CELE_R08F11.3	R08F11.3.1	Stress response: detoxification	Stress response: detoxification	CYtochrome P450 family
D1086.5	WBGene00008392	D1086.5	CELE_D1086.5	D1086.5.1	Unknown	Unknown	Uncharacterized protein CELE_D1086.5
daao-1	WBGene00022076	Y69A2AR.5	CELE_Y69A2AR.5	Y69A2AR.5.1	Metabolism: amino acid	Metabolism: amino acid	D-amino-acid oxidase
DC2.5	WBGene00017082	DC2.5	CELE_DC2.5	DC2.5b, DC2.5a.1	Metabolism: short chain dehydrogenase	Metabolism: short chain dehydrogenase	Uncharacterized protein CELE_DC2.5
dct-1	WBGene00015776	C14F5.1	ceBNIP3, CELE_C14F5.1	C14F5.1a.1, C14F5.1b.1	Development: apoptosis	Development: apoptosis	NIP3 homolog
dct-7	WBGene00017488	F15E6.8	CELE_F15E6.8	F15E6.8.1	Unknown	Unknown	DAF-16/FOXO Controlled, germline Tumor affecting
dct-8	WBGene00044472	F56D6.10	CELE_F56D6.10	F56D6.10.1	Unknown	Unknown	DAF-16/FOXO Controlled, germline Tumor affecting
dod-3	WBGene00016052	C24B9.9	CELE_C24B9.9	C24B9.9.1	Unknown	Unknown	Downstream Of DAF-16 (regulated by DAF-16)
E03H4.8	WBGene00008476	E03H4.8	CELE_E03H4.8	E03H4.8.1, E03H4.8.2	Trafficking: ER/Golgi	Trafficking: ER/Golgi	Uncharacterized protein CELE_E03H4.8
E04F6.6	WBGene00017126	E04F6.6	CELE_E04F6.6	E04F6.6.1	Unknown	Unknown	Uncharacterized protein CELE_E04F6.6
EGAP1.1	WBGene00017146	EGAP1.1	CELE_EGAP1.1	EGAP1.1.1	Unknown	Unknown	Uncharacterized protein CELE_EGAP1.1
F08G12.5	WBGene00008588	F08G12.5	CELE_F08G12.5	F08G12.5.1	Unknown	Unknown	Uncharacterized protein CELE_F08G12.5
F09F7.6	WBGene00017303	F09F7.6	CELE_F09F7.6	F09F7.6.1	Unknown	Unknown	Uncharacterized protein CELE_F09F7.6
F10E9.12	WBGene00017361	F10E9.12	CELE_F10E9.12	F10E9.12.1	Unknown	Unknown	Uncharacterized protein CELE_F10E9.12
F13C5.1	WBGene00017422	F13C5.1	CELE_F13C5.1	F13C5.1.1, F13C5.1.2	Transmembrane protein: other	Transmembrane protein: other	Uncharacterized protein CELE_F13C5.1
F13D11.3	WBGene00017428	F13D11.3	CELE_F13D11.3	F13D11.3.1	Signaling: phosphatase	Signaling: phosphatase	Uncharacterized protein CELE_F13D11.3
F14F9.2	WBGene00017465	F14F9.2	CELE_F14F9.2	F14F9.2.1	Unknown	Unknown	Uncharacterized protein CELE_F14F9.2
F14F9.3	WBGene00017466	F14F9.3	CELE_F14F9.3	F14F9.3.1	Unknown	Unknown	Uncharacterized protein CELE_F14F9.3
F14F9.4	WBGene00017467	F14F9.4	CELE_F14F9.4	F14F9.4.1	Unknown	Unknown	Uncharacterized protein CELE_F14F9.4
F15A8.6	WBGene00017478	F15A8.6	CELE_F15A8.6	F15A8.6a.1, F15A8.6a.2, F15A8.6a.3, F15A8.6b.1			Carboxylic ester hydrolase
F15E6.3	WBGene00017484	F15E6.3	CELE_F15E6.3	F15E6.3.1	Unknown	Unknown	Uncharacterized protein CELE_F15E6.3
F17C11.13	WBGene00023503	F17C11.13	CELE_F17C11.13	F17C11.13a.1, F17C11.13b.1	Unknown	Unknown	Uncharacterized protein CELE_F17C11.13
F18G5.6	WBGene00017582	F18G5.6	CELE_F18G5.6	F18G5.6.1	Stress response: pathogen	Stress response: pathogen	Uncharacterized protein CELE_F18G5.6
F21D12.3	WBGene00017663	F21D12.3	CELE_F21D12.3	F21D12.3.1, F21D12.3.2	Transmembrane transport: amino acid	Transmembrane transport: amino acid	Uncharacterized protein CELE_F21D12.3
F22H10.2	WBGene00017726	F22H10.2	CELE_F22H10.2	F22H10.2.1	Stress response: pathogen	Stress response: pathogen	Uncharacterized protein CELE_F22H10.2
F25B3.5	WBGene00009102	F25B3.5	CELE_F25B3.5	F25B3.5a.1, F25B3.5b.1	Unknown	Unknown	Uncharacterized protein CELE_F25B3.5
F26F12.3	WBGene00017834	F26F12.3	CELE_F26F12.3	F26F12.3a.1, F26F12.3b.1, F26F12.3b.2, F26F12.3b.3, F26F12.3c.1	Unknown	Unknown	Uncharacterized protein CELE_F26F12.3
F27D9.2	WBGene00017861	F27D9.2	CELE_F27D9.2	F27D9.2.1	Transmembrane transport: major facilitator	Transmembrane transport: major facilitator	Uncharacterized protein CELE_F27D9.2
F28H1.1	WBGene00017908	F28H1.1	CELE_F28H1.1	F28H1.1.1	Unknown	Unknown	Uncharacterized protein CELE_F28H1.1
F28H6.8	WBGene00044137	F28H6.8	CELE_F28H6.8	F28H6.8.1	Unknown	Unknown	Uncharacterized protein CELE_F28H6.8
F33H12.7	WBGene00045457	F33H12.7	CELE_F33H12.7	F33H12.7.1	Unknown	Unknown	Uncharacterized protein CELE_F33H12.7
F34H10.3	WBGene00009380	F34H10.3	CELE_F34H10.3	F34H10.3.1	Unknown	Unknown	Uncharacterized protein CELE_F34H10.3
F37A8.5	WBGene00009503	F37A8.5	CELE_F37A8.5	F37A8.5.1	Unknown	Unknown	Protein yippee-like F37A8.5
F40F12.9	WBGene00043995	F40F12.9	CELE_F40F12.9	F40F12.9a.1, F40F12.9b.1, F40F12.9c.1, F40F12.9:wp159	Nucleic acid: binding	Nucleic acid: binding	Uncharacterized protein CELE_F40F12.9
F41E6.5	WBGene00018286	F41E6.5	CELE_F41E6.5	F41E6.5a.1, F41E6.5b.1, F41E6.5b.2	Metabolism: mitochondria	Metabolism: mitochondria	Uncharacterized protein CELE_F41E6.5
F43C1.7	WBGene00023423	F43C1.7	CELE_F43C1.7	F43C1.7.1	Unknown	Unknown	Uncharacterized protein CELE_F43C1.7
F43C11.7	WBGene00018384	F43C11.7	CELE_F43C11.7	F43C11.7.1	Extracellular material: matrix	Extracellular material: matrix	Uncharacterized protein CELE_F43C11.7
F43H9.4	WBGene00018400	F43H9.4	CELE_F43H9.4	F43H9.4.1	Protein modification: carbohydrate	Protein modification: carbohydrate	Uncharacterized protein CELE_F43H9.4
F45D3.4	WBGene00009724	F45D3.4	CELE_F45D3.4	F45D3.4a.1, F45D3.4b.1	Unknown	Unknown	Uncharacterized protein CELE_F45D3.4
F45E1.5	WBGene00018466	F45E1.5	WP:CE38519, CELE_F45E1.5	F45E1.5.1	Proteolysis general: carboxypeptidase	Proteolysis general: carboxypeptidase	Uncharacterized protein CELE_F45E1.5
F46A8.13	WBGene00219950	F46A8.13	cel-inc82, CELE_F46A8.13	F46A8.13	Non-coding RNA: ncRNA	Non-coding RNA: ncRNA
F47B10.9	WBGene00009820	F47B10.9	CELE_F47B10.9	F47B10.9.1	Unknown	Unknown	Uncharacterized protein CELE_F47B10.9
F47B8.3	WBGene00009804	F47B8.3	CELE_F47B8.3	F47B8.3.1	Stress response: oxidative	Stress response: oxidative	Uncharacterized protein CELE_F47B8.3
F47B8.4	WBGene00009805	F47B8.4	CELE_F47B8.4	F47B8.4a.1, F47B8.4b.1	Stress response: pathogen	Stress response: pathogen	Uncharacterized protein CELE_F47B8.4
F53A9.7	WBGene00018730	F53A9.7	CELE_F53A9.7	F53A9.7.1	Unknown	Unknown	Uncharacterized protein CELE_F53A9.7
F53B2.8	WBGene00009957	F53B2.8	CELE_F53B2.8	F53B2.8.1	Unknown	Unknown	Uncharacterized protein CELE_F53B2.8
F53C3.6	WBGene00018750	F53C3.6	CELE_F53C3.6	F53C3.6b, F53C3.6a.1	Transmembrane protein: other	Transmembrane protein: other	Uncharacterized protein CELE_F53C3.6
F54B8.4	WBGene00010019	F54B8.4	CELE_F54B8.4	F54B8.4a.1, F54B8.4b.1	Unknown	Unknown	Uncharacterized protein CELE_F54B8.4
F55C12.19	WBGene00271817	F55C12.19	CELE_F55C12.19	F55C12.19.1	Unknown	Unknown	Uncharacterized protein CELE_F55C12.19
F56C4.4	WBGene00044977	F56C4.4	CELE_F56C4.4	F56C4.4a.1, F56C4.4b.1	Unknown	Unknown	Uncharacterized protein CELE_F56C4.4
F56D6.8	WBGene00044292	F56D6.8	CELE_F56D6.8	F56D6.8.1	Unknown	Unknown	Uncharacterized protein CELE_F56D6.8
F57B9.3	WBGene00018997	F57B9.3	phi-2, CELE_F57B9.3	F57B9.3.1	Ribosome: EIF	Ribosome: EIF	Uncharacterized protein CELE_F57B9.3
F58G6.9	WBGene00044107	F58G6.9	CELE_F58G6.9	F58G6.9a.1, F58G6.9a.2, F58G6.9b.1, F58G6.9b.2, F58G6.9c.1, F58G6.9c.2	Transmembrane transport: solute carrier	Transmembrane transport: solute carrier	Uncharacterized protein CELE_F58G6.9
F59B10.4	WBGene00010320	F59B10.4	CELE_F59B10.4	F59B10.4a.1, F59B10.4b.1	Unknown	Unknown	Uncharacterized protein CELE_F59B10.4
F59E11.7	WBGene00019113	F59E11.7	CELE_F59E11.7	F59E11.7a.1, F59E11.7b.1, F59E11.7b.2, F59E11.7c.1	Unknown	Unknown	Uncharacterized protein CELE_F59E11.7
fbxa-105	WBGene00015362	C02H6.2	CELE_C02H6.2	C02H6.2.1	Proteolysis proteasome: E3	Proteolysis proteasome: E3	F-box A protein
fbxa-163	WBGene00015598	C08E3.6	CELE_C08E3.6	C08E3.6.1	Proteolysis proteasome: E3	Proteolysis proteasome: E3	F-box A protein
fbxa-189	WBGene00009840	F47H4.9	CELE_F47H4.9	F47H4.9.1	Proteolysis proteasome: E3	Proteolysis proteasome: E3	F-box A protein
fbxa-24	WBGene00018803	F54D10.2	CELE_F54D10.2	F54D10.2.1	Proteolysis proteasome: E3	Proteolysis proteasome: E3	F-box A protein
fbxa-66	WBGene00021865	Y54F10BM.11	CELE_Y54F10BM.11	Y54F10BM.11.1, Y54F10BM.11.2	Proteolysis proteasome: E3	Proteolysis proteasome: E3	F-box A protein
fbxa-80	WBGene00022330	Y82E9BL.14	CELE_Y82E9BL.14	Y82E9BL.14.1	Proteolysis proteasome: E3	Proteolysis proteasome: E3	F-box A protein
fbxa-82	WBGene00007716	C25D7.4	CELE_C25D7.4	C25D7.4a.1, C25D7.4b.1	Proteolysis proteasome: E3	Proteolysis proteasome: E3	F-box A protein
fbxa-91	WBGene00022494	Y119D3B.18	CELE_Y119D3B.18	N.A.	Proteolysis proteasome: E3	Proteolysis proteasome: E3	F-box A protein
fbxa-92	WBGene00022496	Y119D3B.20	CELE_Y119D3B.20	N.A.	Proteolysis proteasome: E3	Proteolysis proteasome: E3	F-box A protein
fbxl-1	WBGene00015350	C02F5.7	cfl-1, CELE_C02F5.7	C02F5.7a.1, C02F5.7a.2, C02F5.7b.1	Proteolysis proteasome: E3	Proteolysis proteasome: E3	Uncharacterized F-box/LRR-repeat protein C02F5.7
fipr-22	WBGene00007989	C37A5.2	CELE_C37A5.2	C37A5.2.1	Unknown	Unknown	FIP (Fungus-Induced Protein) Related
fipr-24	WBGene00007992	C37A5.8	CELE_C37A5.8	C37A5.8.1	Unknown	Unknown	FIP (Fungus-Induced Protein) Related
fipr-26	WBGene00009963	F53B6.8	CELE_F53B6.8	F53B6.8.1	Unknown	Unknown	FIP (Fungus-Induced Protein) Related
fkh-7	WBGene00001439	F26D12.1	F26D12.a, F26D12.a, F26D12.b, F26D12.b, CELE_F26D12.1	F26D12.1c, F26D12.1d, F26D12.1a.1, F26D12.1b.1, F26D12.1e.1, F26D12.1f.1, F26D12.1g.1, F26D12.1h.1, F26D12.1i.1, F26D12.1j.1, F26D12.1k.1, F26D12.1l.1, F26D12.1m.1, F26D12.1n.1, F26D12.1o.1, F26D12.1p.1	Transcription factor: forkhead	Transcription factor: forkhead	ForKHead transcription factor family
ftn-1	WBGene00001500	C54F6.14	CELE_C54F6.14	C54F6.14.1	Metabolism: mitochondria	Metabolism: mitochondria	Ferritin
gem-4	WBGene00001577	T12A7.1	tag-121, CELE_T12A7.1	T12A7.1.1, T12A7.1.2	Transmembrane protein: other	Transmembrane protein: other	Gon-2 Extragenic Modifier
glo-3	WBGene00010341	F59F5.2	XL153, CELE_F59F5.2	F59F5.2b, F59F5.2a.1	Development: somatic	Development: somatic	Gut granule LOss
gpa-1	WBGene00001663	T19C4.6	CELE_T19C4.6	T19C4.6a.1, T19C4.6b.1	Signaling: heteromeric G protein	Signaling: heteromeric G protein	Guanine nucleotide-binding protein alpha-1 subunit
H28G03.1	WBGene00019249	H28G03.1	CELE_H28G03.1	H28G03.1a.1, H28G03.1b.1, H28G03.1c.1			Uncharacterized protein CELE_H28G03.1
haf-7	WBGene00001817	Y50E8A.16	CELE_Y50E8A.16	Y50E8A.16.1	Transmembrane transport: ABC	Transmembrane transport: ABC	HAlF transporter (PGP related)
hil-1	WBGene00001852	C30G7.1	H1.X, CELE_C30G7.1	C30G7.1.1	Transcription: chromatin structure	Transcription: chromatin structure	Histone H1.X
hpd-1	WBGene00001993	T21C12.2	CELE_T21C12.2	T21C12.2.1	Metabolism: amino acid	Metabolism: amino acid	4-hydroxyphenylpyruvate dioxygenase
hrg-1	WBGene00019830	R02E12.6	CELE_R02E12.6	R02E12.6.1, R02E12.6.2, R02E12.6.3	Transmembrane transport: heme	Transmembrane transport: heme	Heme transporter hrg-1
hrg-2	WBGene00010473	K01D12.14	cdr-5, CELE_K01D12.14	K01D12.14.1	Unknown	Unknown	Heme Responsive Gene
hsp-12.3	WBGene00002012	F38E11.1	CELE_F38E11.1	F38E11.1.1	Stress response: heat	Stress response: heat	Heat Shock Protein
hsp-70	WBGene00002026	C12C8.1	mtHSP70, CELE_C12C8.1	C12C8.1.1	Stress response: heat	Stress response: heat	Heat Shock Protein
irg-2	WBGene00016783	C49G7.5	CELE_C49G7.5	C49G7.5.1	Stress response: pathogen	Stress response: pathogen	Infection Response Gene
ist-1	WBGene00002163	C54D1.3	CELE_C54D1.3	C54D1.3b.1, C54D1.3c.1, C54D1.3d.1, C54D1.3e.1	Signaling: other	Signaling: other	Insulin receptor SubsTrate homolog
K01C8.1	WBGene00010456	K01C8.1	CELE_K01C8.1	K01C8.1.1, K01C8.1.2	Metabolism: amino acid	Metabolism: amino acid	Uncharacterized protein CELE_K01C8.1
K01F9.2	WBGene00010475	K01F9.2	CELE_K01F9.2	K01F9.2.1	Unknown	Unknown	Uncharacterized protein CELE_K01F9.2
K02D7.1	WBGene00019298	K02D7.1	CELE_K02D7.1	K02D7.1a.1, K02D7.1a.2, K02D7.1a.3, K02D7.1b.1			Purine nucleoside phosphorylase
K05B2.4	WBGene00019404	K05B2.4	CELE_K05B2.4	K05B2.4.1	Metabolism: lipid	Metabolism: lipid	Uncharacterized protein CELE_K05B2.4
K06A9.2	WBGene00019436	K06A9.2	CELE_K06A9.2	K06A9.2.1	Proteolysis proteasome: E3	Proteolysis proteasome: E3	Uncharacterized protein CELE_K06A9.2
K06G5.3	WBGene00010607	K06G5.3	CELE_K06G5.3	K06G5.3a.1, K06G5.3b.1	Unknown	Unknown	Uncharacterized protein CELE_K06G5.3
K08D8.12	WBGene00194926	K08D8.12	CELE_K08D8.12	K08D8.12a.1, K08D8.12a.2, K08D8.12b.1, K08D8.12c.1	Unknown	Unknown	Uncharacterized protein CELE_K08D8.12
K08D9.4	WBGene00019525	K08D9.4	CELE_K08D9.4	K08D9.4a.1, K08D9.4b.1	Unknown	Unknown	Uncharacterized protein CELE_K08D9.4
K09C8.7	WBGene00010717	K09C8.7	CELE_K09C8.7	K09C8.7.1	Unknown	Unknown	Uncharacterized protein CELE_K09C8.7
K10G4.3	WBGene00010752	K10G4.3	CELE_K10G4.3	K10G4.3.1	Unknown	Unknown	Uncharacterized protein CELE_K10G4.3
K10G6.9	WBGene00206374	K10G6.9	CELE_K10G6.9	K10G6.9.1	Unknown	Unknown	Uncharacterized protein CELE_K10G6.9
K12H6.6	WBGene00019686	K12H6.6	CELE_K12H6.6	K12H6.6b, K12H6.6a.1	Unknown	Unknown	Uncharacterized protein CELE_K12H6.6
kgb-2	WBGene00002188	ZC416.4	CELE_ZC416.4	ZC416.4.1	Stress response: signaling	Stress response: signaling	Mitogen-activated protein kinase
kreg-1	WBGene00018725	F53A9.2	CELE_F53A9.2	F53A9.2.1	Stress response: heavy metal	Stress response: heavy metal	Protein kreg-1
linc-37	WBGene00219709	K02F3.14	CELE_K02F3.14	K02F3.14	Non-coding RNA: linc	Non-coding RNA: linc
M01B2.13	WBGene00045338	M01B2.13	CELE_M01B2.13	M01B2.13.1	Unknown	Unknown	Uncharacterized protein CELE_M01B2.13
M01H9.3	WBGene00019719	M01H9.3	CELE_M01H9.3	M01H9.3a.1, M01H9.3b.1, M01H9.3b.2, M01H9.3c.1, M01H9.3d.1, M01H9.3d.2, M01H9.3e.1	Unknown	Unknown	Uncharacterized protein CELE_M01H9.3
M163.1	WBGene00010935	M163.1	CELE_M163.1	M163.1.1	Unknown	Unknown	Uncharacterized protein CELE_M163.1
M60.7	WBGene00019782	M60.7	CELE_M60.7	M60.7.1	Signaling: heteromeric G protein	Signaling: heteromeric G protein	Uncharacterized protein CELE_M60.7
mai-1	WBGene00003124	K10B3.9	CELE_K10B3.9	K10B3.9.1, K10B3.9.2	Metabolism: mitochondria	Metabolism: mitochondria	ATPase inhibitor mai-1, mitochondrial
mtl-1	WBGene00003473	K11G9.6	met-I, met-I, CELE_K11G9.6	K11G9.6.1	Stress response: heavy metal	Stress response: heavy metal	Metallothionein-1
nep-26	WBGene00014171	ZK970.1	CELE_ZK970.1	ZK970.1a.1, ZK970.1a.2, ZK970.1b.1	Proteolysis general: metallopeptidase	Proteolysis general: metallopeptidase	NEPrilysin metallopeptidase family
nhr-103	WBGene00003693	F44C8.4	CELE_F44C8.4	F44C8.4.1	Transcription factor: NHR	Transcription factor: NHR	Nuclear hormone receptor family member nhr-103
nhr-107	WBGene00003697	C33G8.11	CELE_C33G8.11	C33G8.11.1	Transcription factor: NHR	Transcription factor: NHR	Nuclear Hormone Receptor family
nhr-115	WBGene00003705	T27B7.4	CELE_T27B7.4	T27B7.4a.1, T27B7.4b.1	Transcription factor: NHR	Transcription factor: NHR	Nuclear hormone receptor family member nhr-115
nhr-126	WBGene00003716	F44C8.10	F44C8.f, F44C8.f, CELE_F44C8.10	F44C8.10.1	Transcription factor: NHR	Transcription factor: NHR	Nuclear Hormone Receptor family
nhr-132	WBGene00003722	R11G11.1	CELE_R11G11.1	R11G11.1.1	Transcription factor: NHR	Transcription factor: NHR	Nuclear Hormone Receptor family
nhr-18	WBGene00003617	F44C8.3	CELE_F44C8.3	F44C8.3.1	Transcription factor: NHR	Transcription factor: NHR	Nuclear hormone receptor family member nhr-18
nhr-211	WBGene00020152	T01G6.5	CELE_T01G6.5	T01G6.5.1	Transcription factor: NHR	Transcription factor: NHR	Nuclear Hormone Receptor family
nhr-212	WBGene00020153	T01G6.6	CELE_T01G6.6	T01G6.6a.1, T01G6.6b.1	Transcription factor: NHR	Transcription factor: NHR	Nuclear Hormone Receptor family
nhr-226	WBGene00020850	T27B7.3	CELE_T27B7.3	T27B7.3.1	Transcription factor: NHR	Transcription factor: NHR	Nuclear Hormone Receptor family
nhr-228	WBGene00020852	T27B7.6	CELE_T27B7.6	T27B7.6c, T27B7.6d, T27B7.6a.1, T27B7.6b.1	Transcription factor: NHR	Transcription factor: NHR	Nuclear Hormone Receptor family
nhr-230	WBGene00012446	Y17D7A.1	CELE_Y17D7A.1	Y17D7A.1.1	Transcription factor: NHR	Transcription factor: NHR	Nuclear Hormone Receptor family
nhr-57	WBGene00003647	T05B4.2	CELE_T05B4.2	T05B4.2.1	Stress response: pathogen	Stress response: pathogen	Nuclear hormone receptor family member nhr-57
nhr-79	WBGene00003669	T26H2.9	CELE_T26H2.9	T26H2.9a.1, T26H2.9b.1	Transcription factor: NHR	Transcription factor: NHR	Nuclear hormone receptor family member nhr-79
nhr-90	WBGene00003680	ZK488.2	CELE_ZK488.2	ZK488.2.1	Transcription factor: NHR	Transcription factor: NHR	Nuclear hormone receptor family member nhr-90
nhr-99	WBGene00003689	M02H5.1	M02H5.h, M02H5.h, CELE_M02H5.1	M02H5.1.1	Transcription factor: NHR	Transcription factor: NHR	Nuclear Hormone Receptor family
nipi-3	WBGene00010700	K09A9.1	CELE_K09A9.1	K09A9.1.1	Signaling: MAPK	Signaling: MAPK	Protein nipi-3
nnt-1	WBGene00003778	C15H9.1	CELE_C15H9.1	C15H9.1.1	Stress response: other	Stress response: other	Nicotinamide Nucleotide Transhydrogenase
pals-34	WBGene00017823	F26D11.6	CELE_F26D11.6	F26D11.6.1	Unknown	Unknown	Protein containing ALS2cr12 (ALS2CR12) signature
pals-6	WBGene00007660	C17H1.7	CELE_C17H1.7	C17H1.7.1	Unknown	Unknown	Protein containing ALS2cr12 (ALS2CR12) signature
parg-2	WBGene00004052	H23L24.5	pme-4, CELE_H23L24.5	H23L24.5.1	Stress response: other	Stress response: other	Poly(ADP-ribose) glycohydrolase 2
pcs-1	WBGene00003960	F54D5.1	TFIIE-beta, CePCS, CELE_F54D5.1	F54D5.1a.1, F54D5.1b.1	Extracellular material: PGI	Extracellular material: PGI	PhytoChelatin Synthase
pek-1	WBGene00003970	F46C3.1	perk, CELE_F46C3.1	F46C3.1.1	Stress response: ER	Stress response: ER	Eukaryotic translation initiation factor 2-alpha kinase pek-1
pgp-3	WBGene00003997	ZK455.7	cepgpC, CELE_ZK455.7	ZK455.7.1	Transmembrane transport: ABC	Transmembrane transport: ABC	Multidrug resistance protein pgp-3
pgp-9	WBGene00004003	C47A10.1	CELE_C47A10.1	C47A10.1.1	Transmembrane transport: ABC	Transmembrane transport: ABC	P-GlycoProtein related
pitr-5	WBGene00017312	F09G2.3	CELE_F09G2.3	F09G2.3.1, F09G2.3.2	Transmembrane transport: solute carrier	Transmembrane transport: solute carrier	Phosphate transporter
ptr-22	WBGene00004236	Y80D3A.7	CELE_Y80D3A.7	Y80D3A.7a.1, Y80D3A.7b.1	Signaling: hedgehog-like	Signaling: hedgehog-like	PaTched Related family
R06B9.5	WBGene00011056	R06B9.5	CELE_R06B9.5	R06B9.5.1	Unknown	Unknown	Uncharacterized protein CELE_R06B9.5
R06C1.6	WBGene00011060	R06C1.6	CELE_R06C1.6	R06C1.6.1	Unknown	Unknown	Uncharacterized protein CELE_R06C1.6
R08F11.4	WBGene00019968	R08F11.4	CELE_R08F11.4	R08F11.4.1	Unknown	Unknown	Uncharacterized protein CELE_R08F11.4
R102.1	WBGene00011288	R102.1	CELE_R102.1	R102.1.1	Unknown	Unknown	Uncharacterized protein CELE_R102.1
R186.1	WBGene00011305	R186.1	CELE_R186.1	R186.1.1	Trafficking: ER/Golgi	Trafficking: ER/Golgi	Uncharacterized protein CELE_R186.1
scl-2	WBGene00009895	F49E11.10	CELE_F49E11.10	F49E11.10a.1, F49E11.10b.1	Transmembrane protein: other	Transmembrane protein: other	SCP-Like extracellular protein
slc-17.4	WBGene00012130	T28F3.4	CELE_T28F3.4	T28F3.4a.1, T28F3.4b.1	Transmembrane transport: solute carrier	Transmembrane transport: solute carrier	SLC (SoLute Carrier) homolog
slc-36.5	WBGene00016628	C44B7.6	CELE_C44B7.6	C44B7.6a.1, C44B7.6b.1	Transmembrane transport: amino acid	Transmembrane transport: amino acid	SLC (SoLute Carrier) homolog
sodh-1	WBGene00010790	K12G11.3	dod-11, CELE_K12G11.3	K12G11.3.1	Metabolism: mitochondria	Metabolism: mitochondria	Alcohol dehydrogenase 1
sqst-1	WBGene00011737	T12G3.1	CELE_T12G3.1	T12G3.1a.1, T12G3.1b.1	Signaling: other	Signaling: other	SeQueSTosome related
srd-27	WBGene00005105	T26E4.12	CELE_T26E4.12	T26E4.12.1	Transmembrane protein: seven transmembrane receptor	Transmembrane protein: seven transmembrane receptor	Serpentine Receptor, class D (delta)
srh-48	WBGene00005271	C06C3.6	CELE_C06C3.6	C06C3.6.1, C06C3.6.2, C06C3.6.3	Transmembrane protein: seven transmembrane receptor	Transmembrane protein: seven transmembrane receptor	Serpentine Receptor, class H
sri-36	WBGene00005548	F33H12.5	CELE_F33H12.5	F33H12.5.1	Transmembrane protein: seven transmembrane receptor	Transmembrane protein: seven transmembrane receptor	Serpentine Receptor, class I
sri-39	WBGene00005551	F33H12.2	CELE_F33H12.2	F33H12.2.1	Transmembrane protein: seven transmembrane receptor	Transmembrane protein: seven transmembrane receptor	Serpentine Receptor, class I
srm-3	WBGene00010273	F58G6.2	CELE_F58G6.2	F58G6.2a.1, F58G6.2b.1, F58G6.2c.1	Transmembrane protein: seven transmembrane receptor	Transmembrane protein: seven transmembrane receptor	Serpentine Receptor, class M
srp-8	WBGene00005649	F20D6.3	CELE_F20D6.3	F20D6.3.1	Proteolysis general: inhibitor	Proteolysis general: inhibitor	SeRPin
sto-1	WBGene00006063	F08C6.4	CELE_F08C6.4	F08C6.4a.1, F08C6.4b.1	Proteolysis general: other	Proteolysis general: other	Stomatin-1
str-31	WBGene00006097	C54F6.10	CELE_C54F6.10	C54F6.10.1	Transmembrane protein: seven transmembrane receptor	Transmembrane protein: seven transmembrane receptor	Seven TM Receptor
swt-1	WBGene00019300	K02D7.5	CELE_K02D7.5	K02D7.5.1	Transmembrane transport: sugar	Transmembrane transport: sugar	Sugar transporter SWEET1
T05H4.15	WBGene00020276	T05H4.15	CELE_T05H4.15	T05H4.15a.1, T05H4.15b.1, T05H4.15c.1	Unknown	Unknown	Uncharacterized protein CELE_T05H4.15
T08A9.13	WBGene00044442	T08A9.13	CELE_T08A9.13	T08A9.13.1	Unknown	Unknown	Uncharacterized protein CELE_T08A9.13
T09F5.12	WBGene00014836	T09F5.12	CELE_T09F5.12	T09F5.12	Unknown	Unknown
T10C6.15	WBGene00050899	T10C6.15	CELE_T10C6.15	T10C6.15a.1, T10C6.15b.1, T10C6.15c.1	Unknown	Unknown	Uncharacterized protein CELE_T10C6.15
T10G3.1	WBGene00011692	T10G3.1	CELE_T10G3.1	T10G3.1.1	Unknown	Unknown	Uncharacterized protein CELE_T10G3.1
T10H9.8	WBGene00044779	T10H9.8	CELE_T10H9.8	T10H9.8.1	Unknown	Unknown	Uncharacterized protein CELE_T10H9.8
T12A7.6	WBGene00011727	T12A7.6	CELE_T12A7.6	T12A7.6.1	Unknown	Unknown	Uncharacterized protein CELE_T12A7.6
T12D8.5	WBGene00011733	T12D8.5	CELE_T12D8.5	T12D8.5b, T12D8.5a.1, T12D8.5a.2	Stress response: heavy metal	Stress response: heavy metal	Uncharacterized protein CELE_T12D8.5
T16G1.5	WBGene00011799	T16G1.5	CELE_T16G1.5	T16G1.5.1	Unknown	Unknown	Uncharacterized protein CELE_T16G1.5
T19C4.5	WBGene00011839	T19C4.5	CELE_T19C4.5	T19C4.5a.1, T19C4.5b.1	Globin	Globin	Uncharacterized protein CELE_T19C4.5
T20D4.7	WBGene00020613	T20D4.7	CELE_T20D4.7	T20D4.7.1	Unknown	Unknown	Uncharacterized protein CELE_T20D4.7
T24C4.4	WBGene00020760	T24C4.4	CELE_T24C4.4	T24C4.4.1	Stress response: pathogen	Stress response: pathogen	Uncharacterized protein CELE_T24C4.4
T27F6.8	WBGene00012107	T27F6.8	CELE_T27F6.8	T27F6.8.1	Proteolysis proteasome: E3	Proteolysis proteasome: E3	Uncharacterized protein CELE_T27F6.8
T28B8.1	WBGene00012113	T28B8.1	CELE_T28B8.1	T28B8.1.1	Unknown	Unknown	Uncharacterized protein CELE_T28B8.1
T28F4.4	WBGene00012139	T28F4.4	CELE_T28F4.4	T28F4.4a.1, T28F4.4a.2, T28F4.4a.3, T28F4.4a.4, T28F4.4b.1	Unknown	Unknown	Uncharacterized protein CELE_T28F4.4
T28F4.5	WBGene00012140	T28F4.5	CELE_T28F4.5	T28F4.5.1, T28F4.5.2	Unknown	Unknown	Uncharacterized protein CELE_T28F4.5
tli-1	WBGene00006578	F25H2.1	CELE_F25H2.1	F25H2.1.1	Unknown	Unknown	ToLlIp homolog
tos-1	WBGene00019466	K07B1.6	CELE_K07B1.6	K07B1.6c, K07B1.6d, K07B1.6e, K07B1.6a.1, K07B1.6b.1, K07B1.6b.2	Unknown	Unknown	Target Of Splicing
tsp-1	WBGene00006627	C02F5.8	CELE_C02F5.8	C02F5.8.1	Stress response: pathogen	Stress response: pathogen	Tetraspanin-1
ttr-23	WBGene00011894	T21C9.8	CELE_T21C9.8	T21C9.8.1, T21C9.8.2	Unknown	Unknown	TransThyretin-Related family domain
ttr-37	WBGene00017667	F21E9.3	CELE_F21E9.3	F21E9.3.1, F21E9.3.2	Development: apoptosis	Development: apoptosis	TransThyretin-Related family domain
tts-1	WBGene00006650	F09E10.11	CELE_F09E10.11	F09E10.11a, F09E10.11b	Non-coding RNA: ncRNA	Non-coding RNA: ncRNA
ubc-8	WBGene00006705	Y94H6A.6	Y94H6A.e, Y94H6A.e, CELE_Y94H6A.6	Y94H6A.6.1	Proteolysis proteasome: E2	Proteolysis proteasome: E2	UBiquitin Conjugating enzyme
ugt-13	WBGene00019232	H23N18.1	CELE_H23N18.1	H23N18.1.1	Stress response: detoxification	Stress response: detoxification	UDP-GlucuronosylTransferase
ugt-18	WBGene00013900	ZC443.5	CELE_ZC443.5	ZC443.5.1	Stress response: detoxification	Stress response: detoxification	UDP-glucuronosyltransferase
ugt-19	WBGene00019515	K08B4.3	CELE_K08B4.3	K08B4.3.1	Stress response: detoxification	Stress response: detoxification	UDP-GlucuronosylTransferase
ugt-33	WBGene00007946	C35A5.2	CELE_C35A5.2	C35A5.2.1	Stress response: detoxification	Stress response: detoxification	UDP-GlucuronosylTransferase
ugt-54	WBGene00012013	T25B9.7	CELE_T25B9.7	T25B9.7.1	Stress response: detoxification	Stress response: detoxification	UDP-GlucuronosylTransferase
W04C9.8	WBGene00235387	W04C9.8	CELE_W04C9.8	W04C9.8	Non-coding RNA: ncRNA	Non-coding RNA: ncRNA
W05H9.1	WBGene00021048	W05H9.1	CELE_W05H9.1	W05H9.1a.1, W05H9.1b.1	Unknown	Unknown	Uncharacterized protein CELE_W05H9.1
Y15E3A.5	WBGene00012444	Y15E3A.5	CELE_Y15E3A.5	Y15E3A.5.1, Y15E3A.5.2	Unknown	Unknown	Uncharacterized protein CELE_Y15E3A.5
Y34F4.4	WBGene00021339	Y34F4.4	CELE_Y34F4.4	Y34F4.4.1, Y34F4.4.2, Y34F4.4.3	Unknown	Unknown	Uncharacterized protein CELE_Y34F4.4
Y34F4.7	WBGene00220140	Y34F4.7	CELE_Y34F4.7	Y34F4.7	Non-coding RNA: ncRNA	Non-coding RNA: ncRNA
Y37A1B.5	WBGene00012538	Y37A1B.5	CELE_Y37A1B.5	Y37A1B.5c, Y37A1B.5a.1, Y37A1B.5b.1	Unknown	Unknown	Uncharacterized protein CELE_Y37A1B.5
Y38H6C.9	WBGene00012622	Y38H6C.9	CELE_Y38H6C.9	Y38H6C.9b, Y38H6C.9c, Y38H6C.9d, Y38H6C.9a.1	Unknown	Unknown	Uncharacterized protein CELE_Y38H6C.9
Y39A3A.4	WBGene00021435	Y39A3A.4	CELE_Y39A3A.4	Y39A3A.4.1, Y39A3A.4.2	Signaling: phosphatase	Signaling: phosphatase	Tyrosine-protein phosphatase
Y42G9A.1	WBGene00021531	Y42G9A.1	CELE_Y42G9A.1	Y42G9A.1.1	Unknown	Unknown	Uncharacterized protein CELE_Y42G9A.1
Y43F8B.14	WBGene00012824	Y43F8B.14	CELE_Y43F8B.14	Y43F8B.14.1	Unknown	Unknown	Uncharacterized protein CELE_Y43F8B.14
Y43F8B.9	WBGene00012819	Y43F8B.9	CELE_Y43F8B.9	Y43F8B.9.1, Y43F8B.9.2, Y43F8B.9.3	Unknown	Unknown	Uncharacterized protein CELE_Y43F8B.9
Y44A6C.1	WBGene00012850	Y44A6C.1	CELE_Y44A6C.1	Y44A6C.1.1	Unknown	Unknown	Uncharacterized protein CELE_Y44A6C.1
Y45F10D.6	WBGene00012886	Y45F10D.6	CELE_Y45F10D.6	Y45F10D.6.1	Unknown	Unknown	Uncharacterized protein CELE_Y45F10D.6
Y46G5A.36	WBGene00012921	Y46G5A.36	CELE_Y46G5A.36	Y46G5A.36.1	Unknown	Unknown	Uncharacterized protein CELE_Y46G5A.36
Y47G6A.5	WBGene00021635	Y47G6A.5	CELE_Y47G6A.5	Y47G6A.5a.1, Y47G6A.5b.1	Unknown	Unknown	Tyrosine-protein kinase
Y47H10A.3	WBGene00012959	Y47H10A.3	CELE_Y47H10A.3	Y47H10A.3.1	Unknown	Unknown	Uncharacterized protein CELE_Y47H10A.3
Y54G11A.7	WBGene00013216	Y54G11A.7	CELE_Y54G11A.7	Y54G11A.7.1	Unknown	Unknown	Uncharacterized protein CELE_Y54G11A.7
Y54G2A.11	WBGene00021876	Y54G2A.11	CELE_Y54G2A.11	Y54G2A.11a.1, Y54G2A.11b.1, Y54G2A.11b.2, Y54G2A.11b.3	Unknown	Unknown	Uncharacterized protein CELE_Y54G2A.11
Y54G2A.36	WBGene00021898	Y54G2A.36	CELE_Y54G2A.36	Y54G2A.36.1, Y54G2A.36.2, Y54G2A.36.3, Y54G2A.36.4, Y54G2A.36.5	Unknown	Unknown	Uncharacterized protein CELE_Y54G2A.36
Y54G2A.52	WBGene00045397	Y54G2A.52	CELE_Y54G2A.52	Y54G2A.52.1	Unknown	Unknown	Uncharacterized protein CELE_Y54G2A.52
Y56A3A.33	WBGene00013244	Y56A3A.33	CELE_Y56A3A.33	Y56A3A.33.1	mRNA functions: processing	mRNA functions: processing	Uncharacterized protein CELE_Y56A3A.33
Y58A7A.3	WBGene00021977	Y58A7A.3	Y58A7A.c, Y58A7A.c, CELE_Y58A7A.3	Y58A7A.3.1, Y58A7A.3.2	Unknown	Unknown	Uncharacterized protein CELE_Y58A7A.3
Y58A7A.4	WBGene00021978	Y58A7A.4	Y58A7A.b, Y58A7A.b, CELE_Y58A7A.4	Y58A7A.4.1	Unknown	Unknown	Uncharacterized protein CELE_Y58A7A.4
Y58A7A.5	WBGene00021979	Y58A7A.5	CELE_Y58A7A.5	Y58A7A.5.1	Unknown	Unknown	Uncharacterized protein CELE_Y58A7A.5
Y6E2A.4	WBGene00012398	Y6E2A.4	CELE_Y6E2A.4	Y6E2A.4.1, Y6E2A.4.2	Unknown	Unknown	Uncharacterized protein CELE_Y6E2A.4
Y6G8.2	WBGene00012404	Y6G8.2	CELE_Y6G8.2	Y6G8.2b, Y6G8.2c, Y6G8.2a.1	Unknown	Unknown	Uncharacterized protein CELE_Y6G8.2
Y71G12B.2	WBGene00022142	Y71G12B.2	CELE_Y71G12B.2	Y71G12B.2.1	Unknown	Unknown	Uncharacterized protein CELE_Y71G12B.2
ZC239.14	WBGene00022572	ZC239.14	CELE_ZC239.14	ZC239.14.1	Transmembrane transport: potassium channel	Transmembrane transport: potassium channel	Uncharacterized protein CELE_ZC239.14
ZC395.5	WBGene00022597	ZC395.5	CELE_ZC395.5	ZC395.5.1	Unknown	Unknown	Uncharacterized protein CELE_ZC395.5
ZC443.3	WBGene00013898	ZC443.3	CELE_ZC443.3	ZC443.3.1	Ribosome: EIF	Ribosome: EIF	Uncharacterized protein CELE_ZC443.3
ZC443.4	WBGene00013899	ZC443.4	CELE_ZC443.4	ZC443.4.1	Unknown	Unknown	Uncharacterized protein CELE_ZC443.4
zig-7	WBGene00006984	F54D7.4	CELE_F54D7.4	F54D7.4.1	Extracellular material: matrix	Extracellular material: matrix	Zwei Ig domain protein zig-7
ZK836.3	WBGene00014099	ZK836.3	CELE_ZK836.3	ZK836.3.1	Unknown	Unknown	Uncharacterized protein CELE_ZK836.3
